# Supplementary material for: Triphenylamine based yellowish-orange light emitting organic dyes (donor–π–acceptor) for hybrid WLEDs and OLEDs: synthesis, characterization and theoretical study
Source: Royal Society of Chemistry journal article supplement (doi:10.1039/c7cp08670a), 2018-01-01
Supplement: c7cp08670a1.pdf [file c7cp08670a1.pdf]

## SUPPLEMENTARY INFORMATION

### **Triphenylamine based yellowish-orange emitting Donor – $\pi$ – Acceptor organic dyes for hybrid WLEDs: synthesis, characterization and theoretical studies.**

Aravind Babu Kajjam<sup>a</sup>, P. Shyam Vinod Kumar<sup>b</sup>, V. Subramanian<sup>b</sup> and V. Sivakumar<sup>a\*</sup>

<sup>a</sup> Department of Chemistry, National Institute of Technology, Rourkela 769 008, India.

<sup>b</sup>CSIR-Central Leather Research Institute, Adyar, Chennai – 600 020

#### **Table of contents**

|                         |     |
|-------------------------|-----|
| NMR Spectra             | S2  |
| Mass spectra            | S8  |
| Lifetime analysis       | S10 |
| DFT analysis            | S11 |
| Solvatochromism studies | S25 |
| CIE color coordinates   | S30 |
| References              | S47 |

## 1. NMR Spectroscopy:

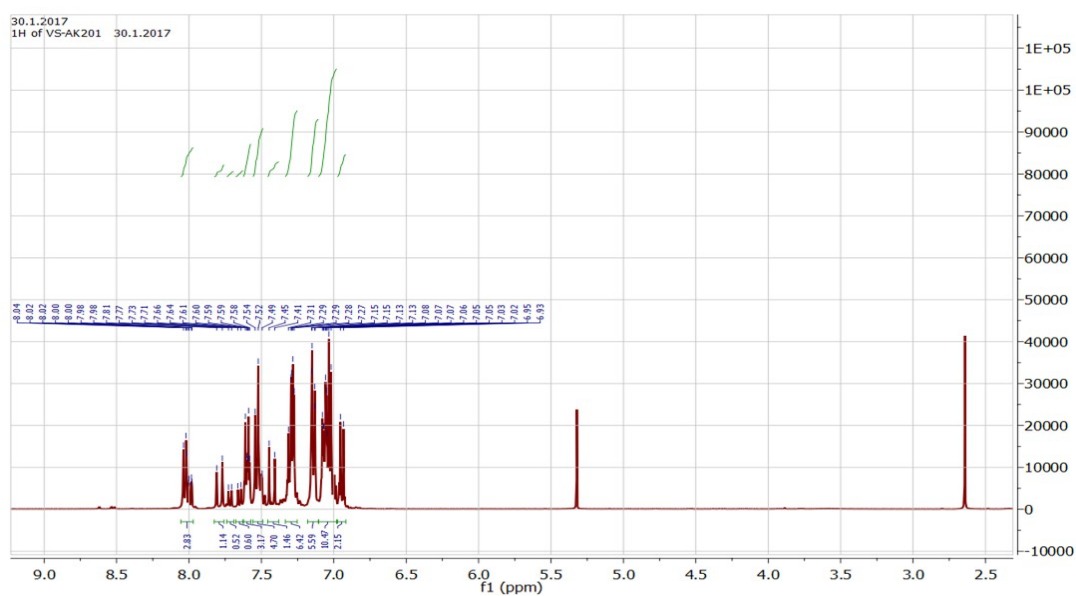

Fig. S1. <sup>1</sup>H-NMR spectra of TPA-1.

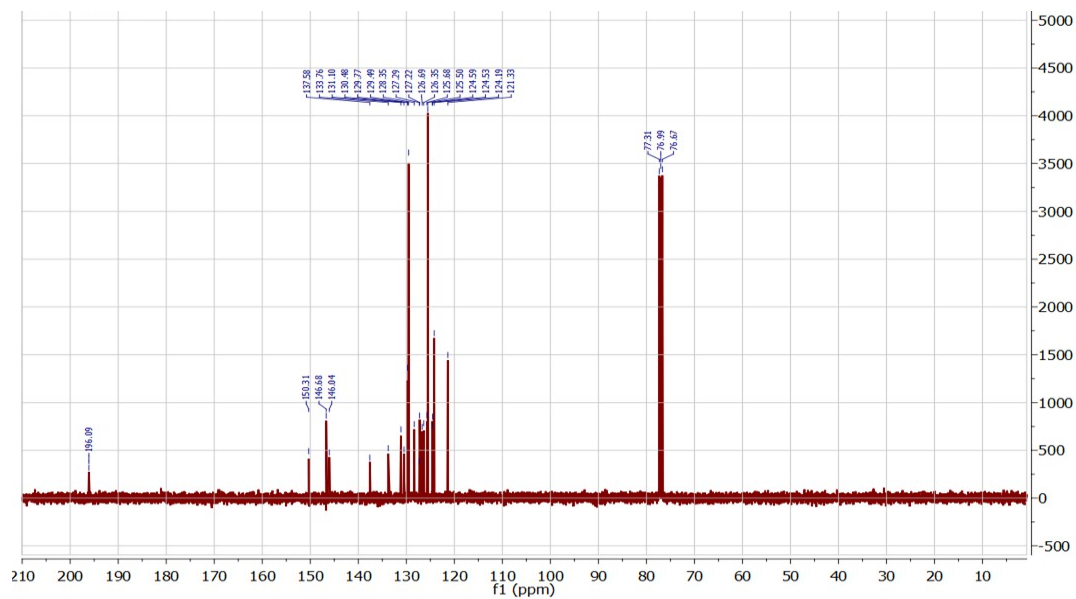

Fig. S2. <sup>13</sup>C-NMR spectra of TPA-1.

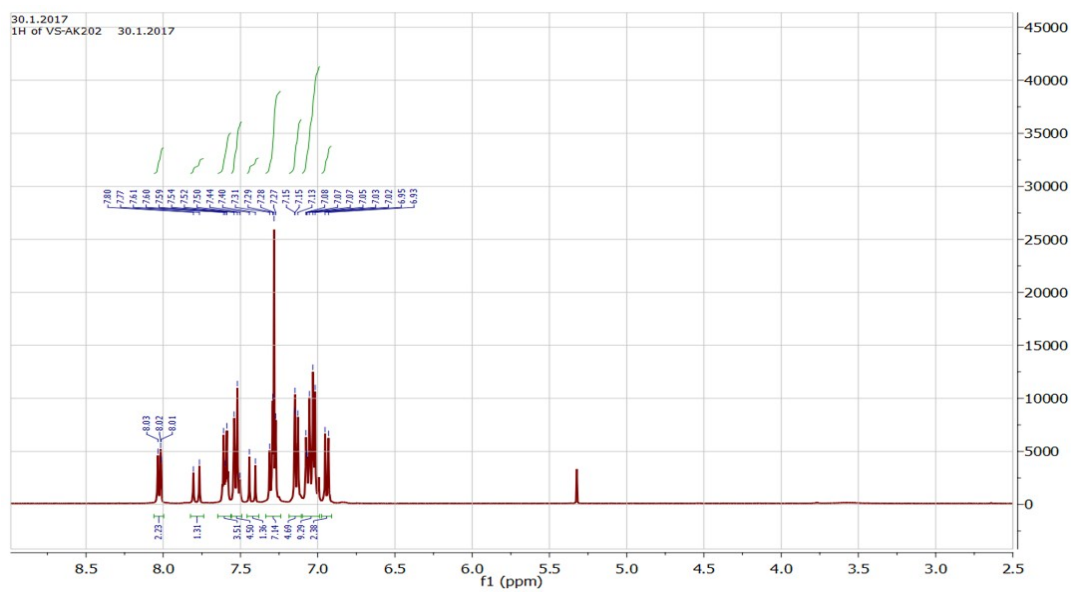

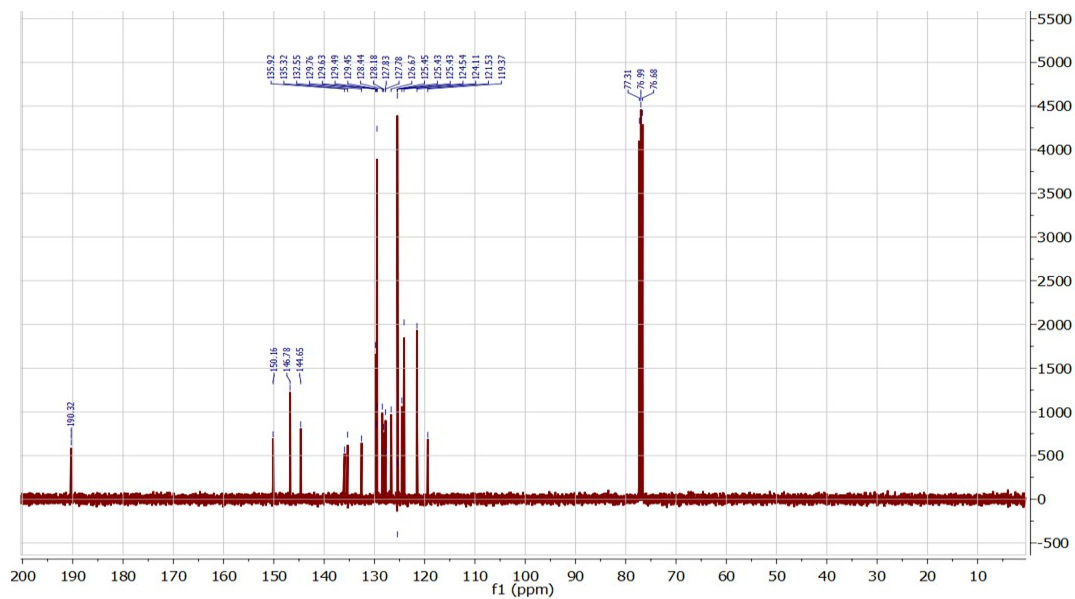

Fig. S4.  $^{13}\text{C}$ -NMR spectra of TPA-2.

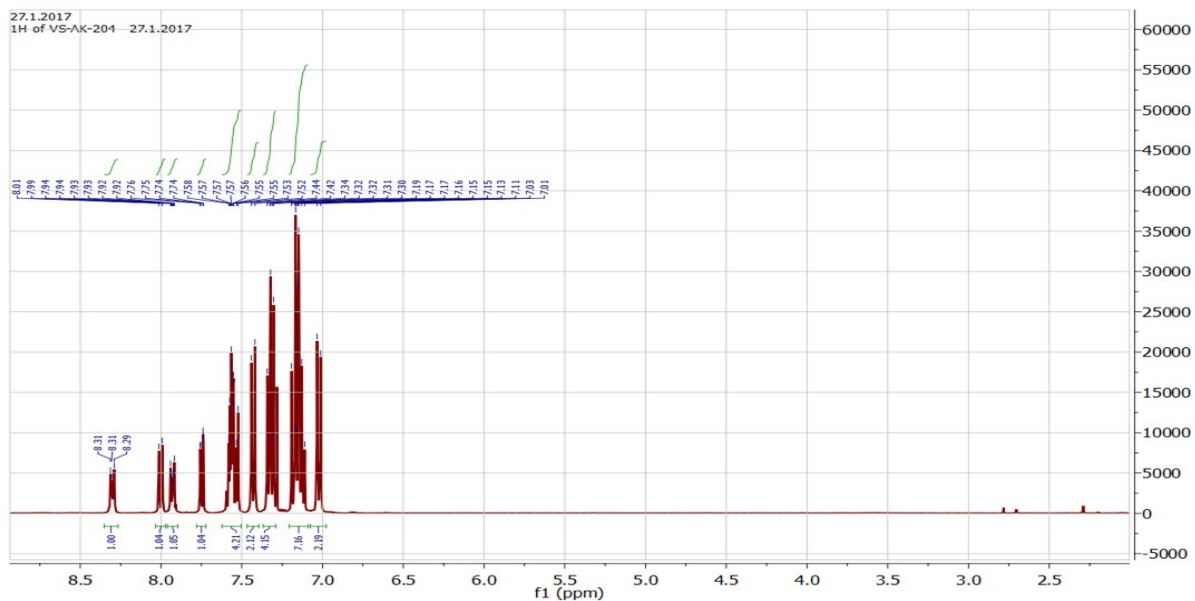

Fig. S5.  $^1\text{H}$ -NMR spectra of TPA-3.



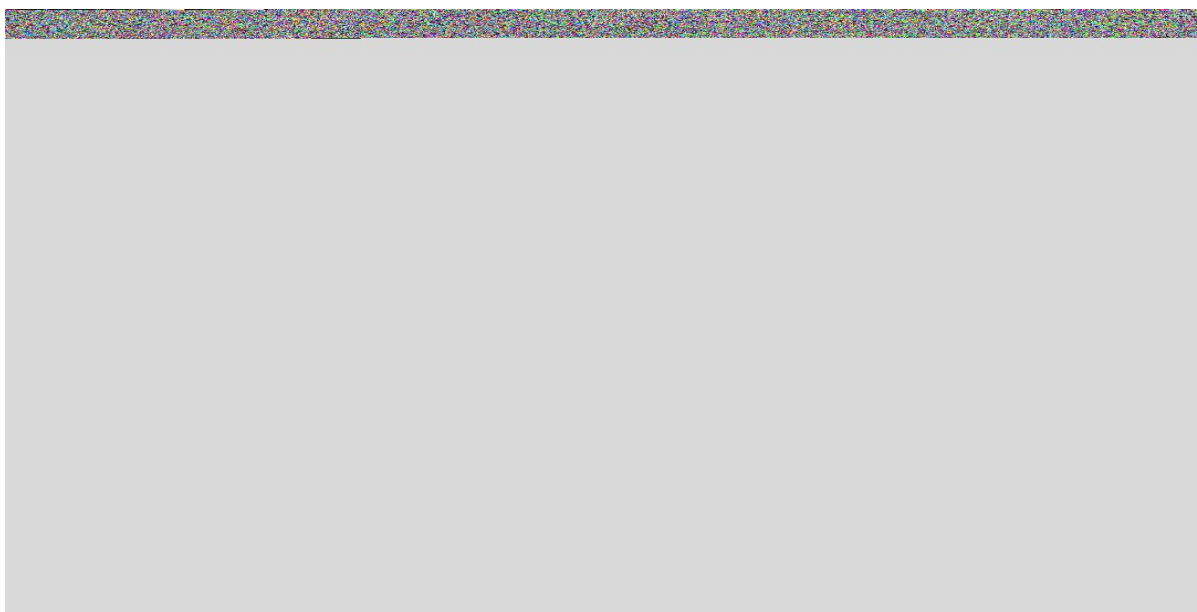

**Fig. S8.**  $^{13}\text{C}$ -NMR spectra of TPA-4.

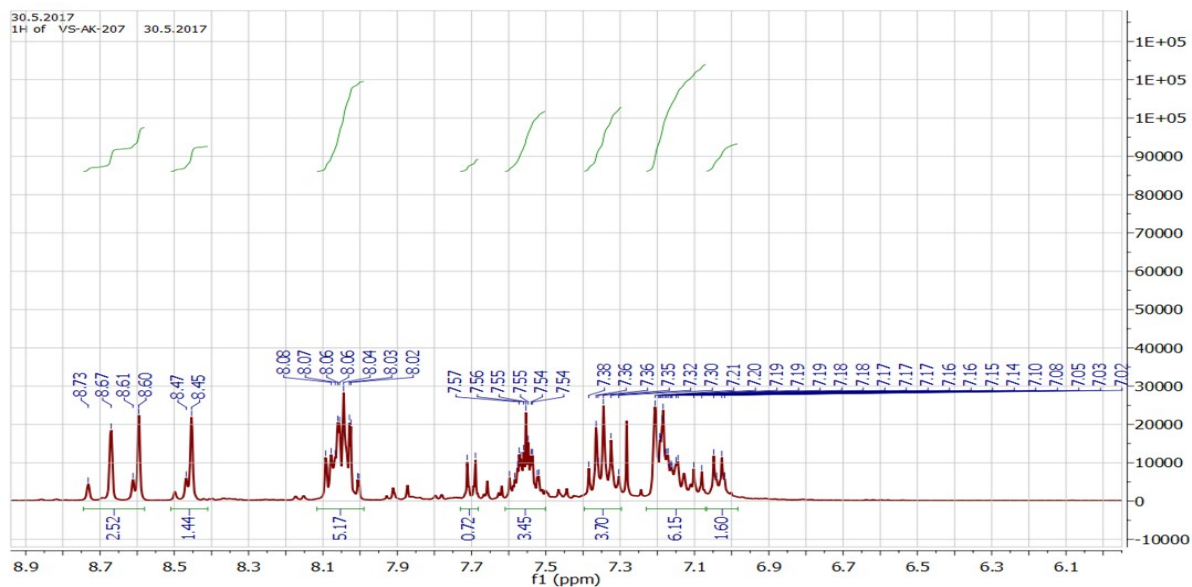

**Fig. S9.**  $^1\text{H}$ -NMR spectra of TPA-5.

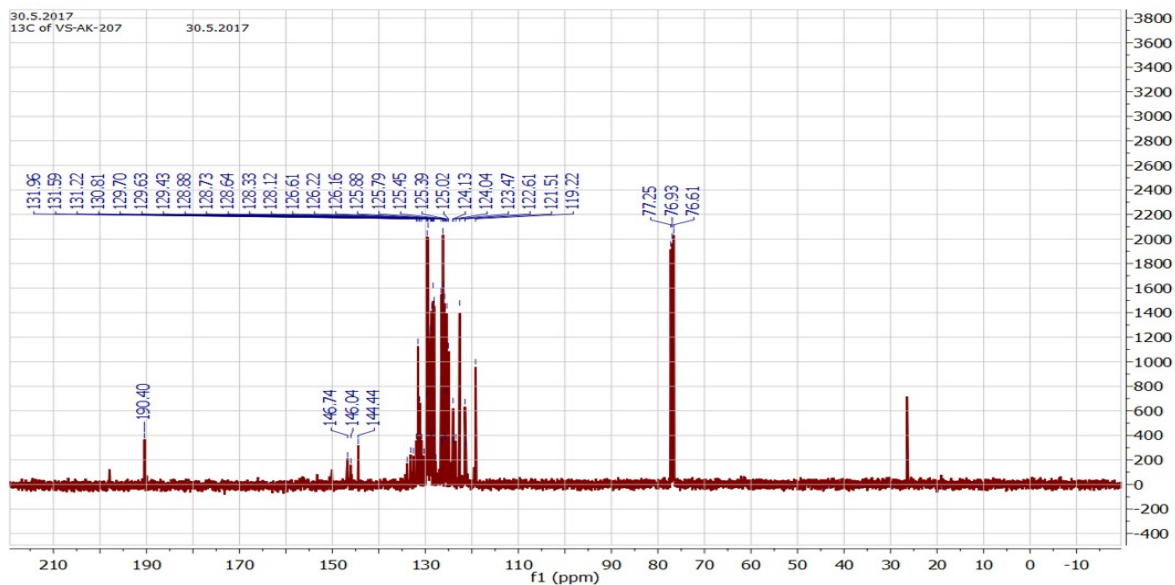

Fig. S10.  $^{13}\text{C}$ -NMR spectra of TPA-5.

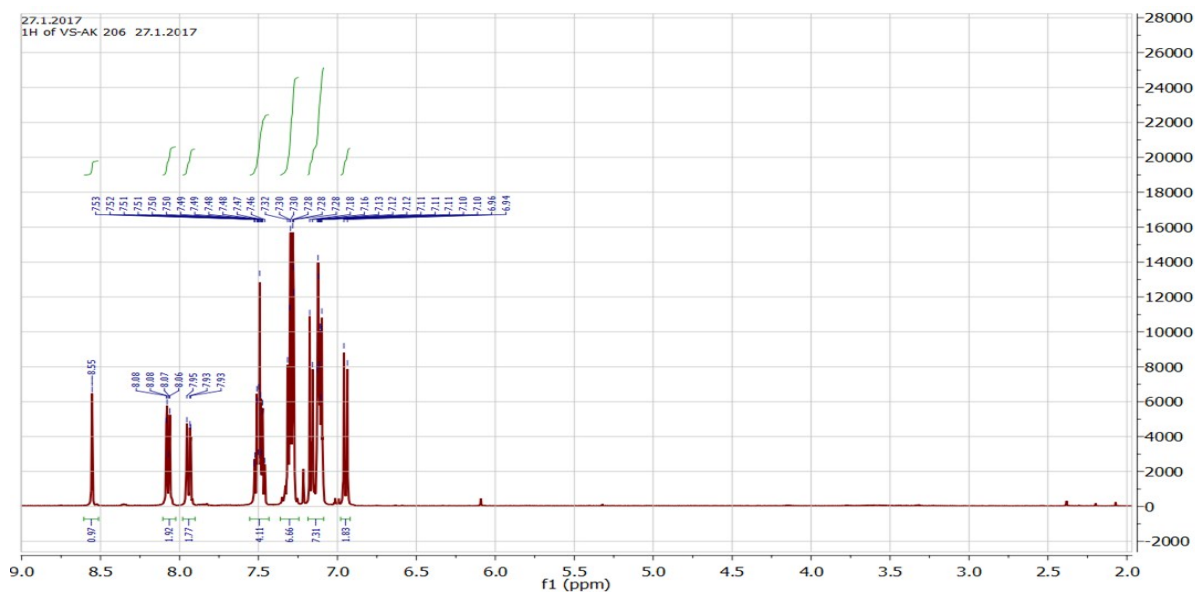

Fig. S11.  $^1\text{H}$ -NMR spectra of TPA-6.

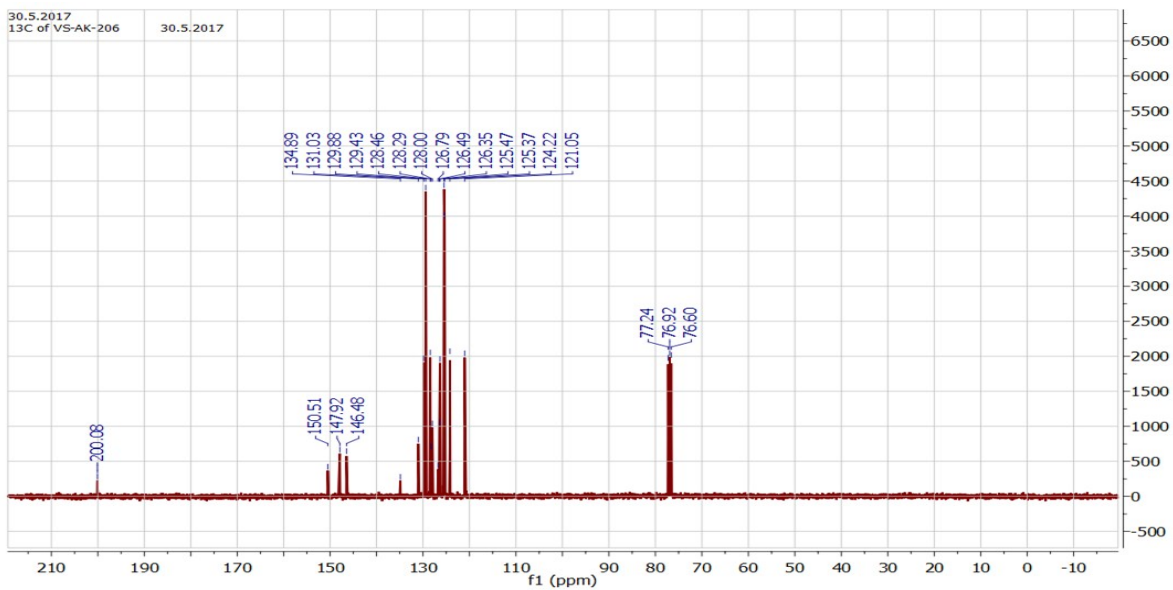

Fig. S12.  $^{13}\text{C}$ -NMR spectra of TPA-6.

## 2. Mass spectra:



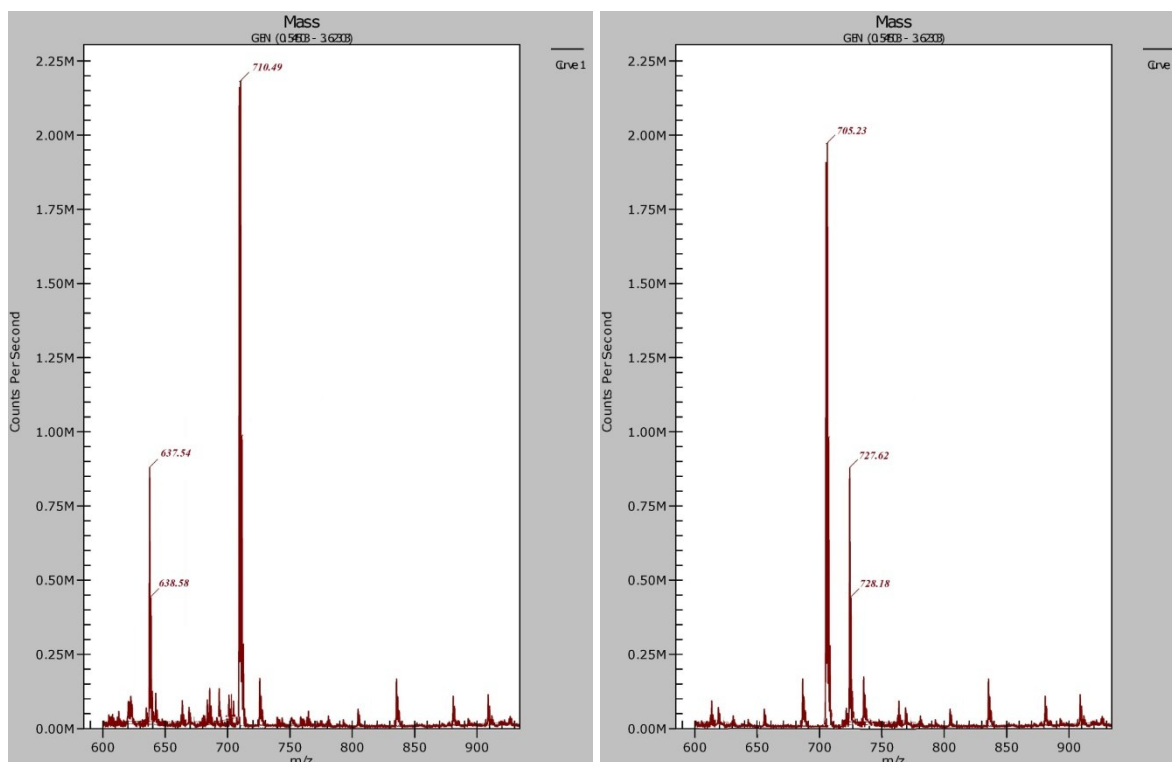

**Fig S13.** Mass spectra of TPA-1 and TPA-2.

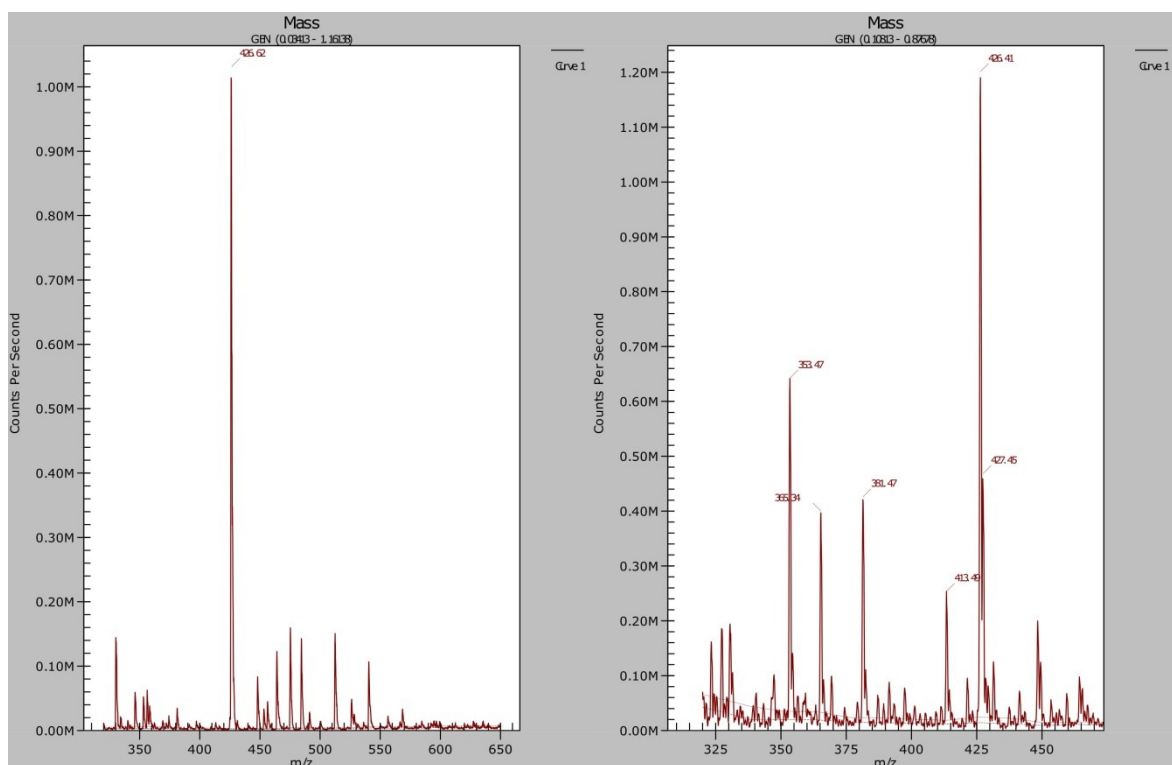

**Fig. S14.** Mass spectroscopy of TPA-3 and TPA-4.

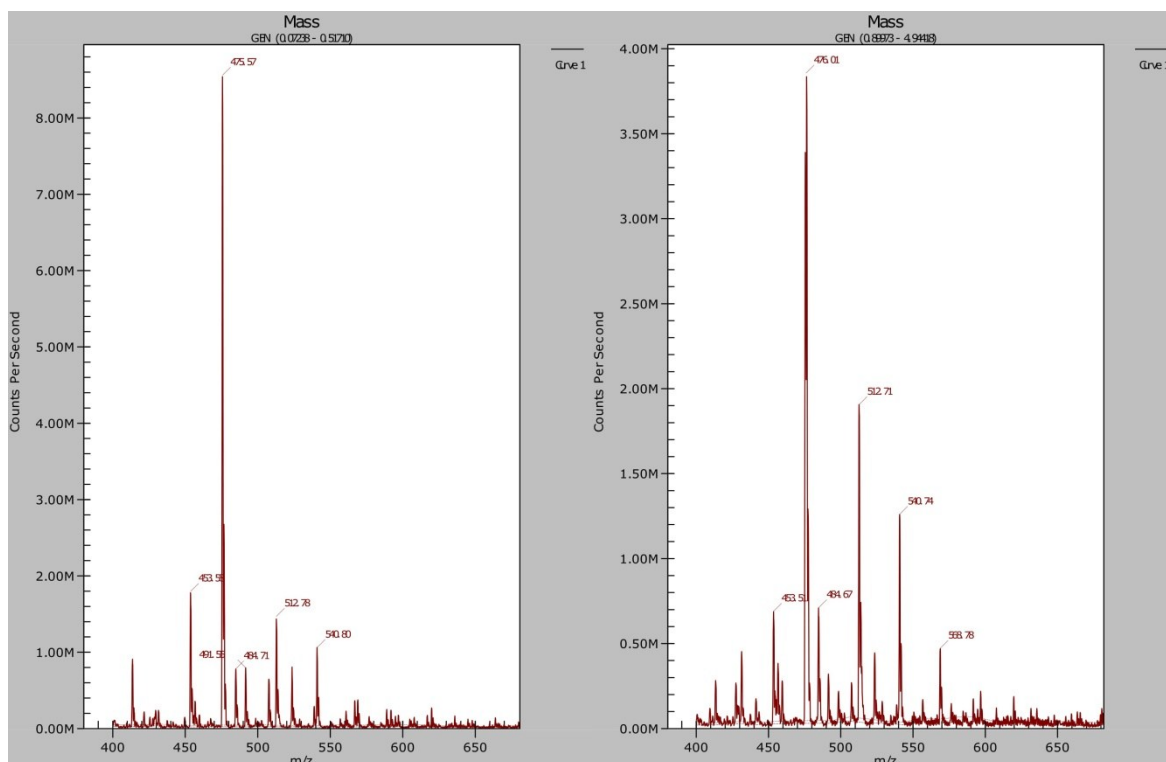

**Fig. S15.** Mass spectroscopy of TPA-5 and TPA-6.

### **Fluorescence Lifetime Decay Studies:**

PL decays and PL lifetime were recorded on a time-resolved (Micro-Time 200, PicoQuant) confocal fluorescence lifetime imaging microscopy (FLIM) setup, which was equipped with an inverted microscope (Olympus IX 71). Measurements were performed at room temperature.

The samples were excited ( $\lambda_{\text{ex}} = 405 \text{ nm}$ ) by ps diode pulse laser (power  $\sim 5 \mu\text{w}$ ) with a stable repetition rate of 20 MHz (FWHM: 176 ps) through a water immersion objective (Olympus UPlansApo; 60 $\times$ ; NA 1.2). Signal from the samples were collected by the same objective and passed through the dichroic mirror, filtered by using a 430 nm long-pass filter to cut off any exciting light. The signal was then focused onto a 50  $\mu\text{m}$  diameter pinhole to remove the out-of-focus signal, recollimated, and directed onto a (50/50) beam splitter prior to entering two single photon avalanche photodiodes (SPADs). The data acquisition was carried out with a SymPhoTime software controlled PicoHarp 300 time-correlated single-photon counting

(TCSPC) module in a time tagged time-resolved mode. The overall resolution of the setup was 4 ps.

The luminescence lifetime values ( $\tau$ ) of the TPA derivatives were found to be in the range of 3.88 – 10.52 ns. The detailed information is tabulated in table 1. It suggests that, the fluorescence lifetime could be modulated by the different electron-donating and electron withdrawing abilities of donor and acceptor groups.

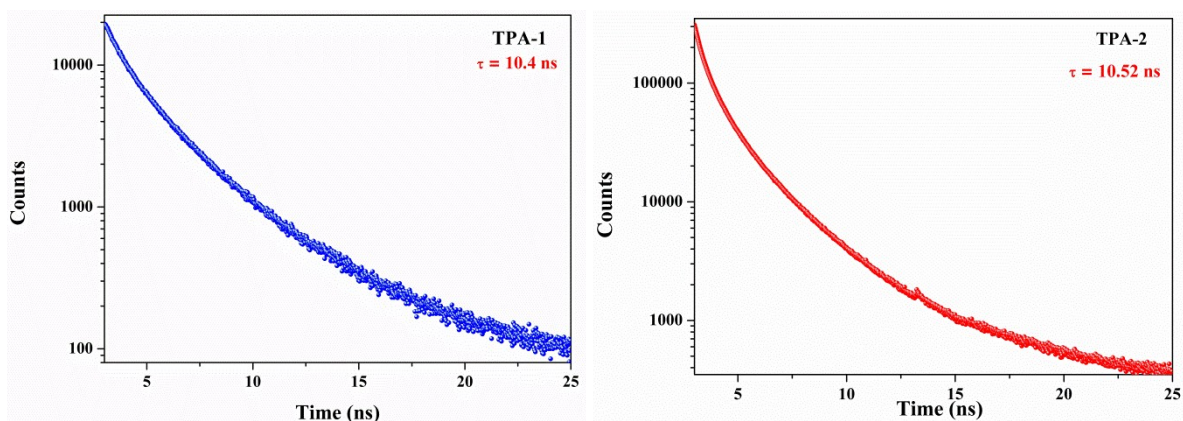

**Fig. S16.** Lifetime measurements of the TPA based organic dyes.

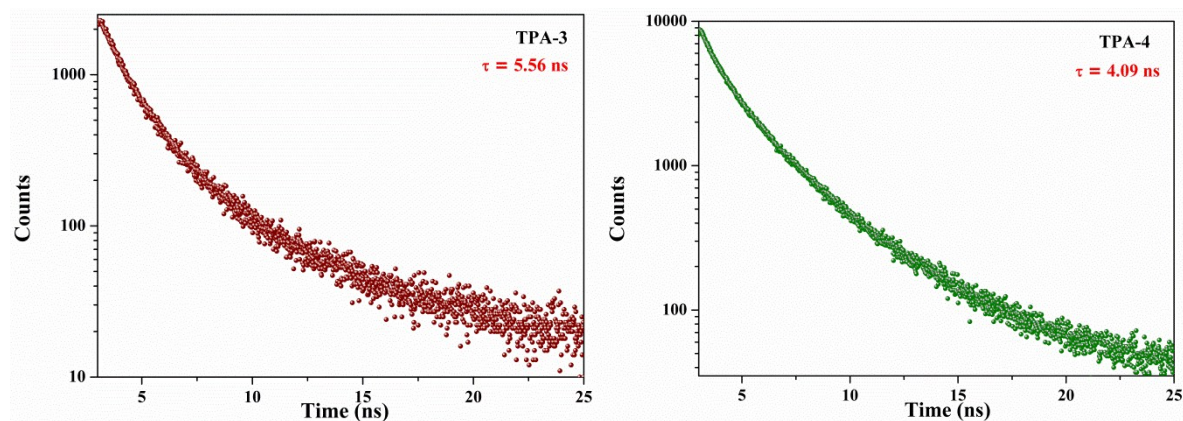

**Fig. S17.** Lifetime measurements of the TPA based organic dyes.

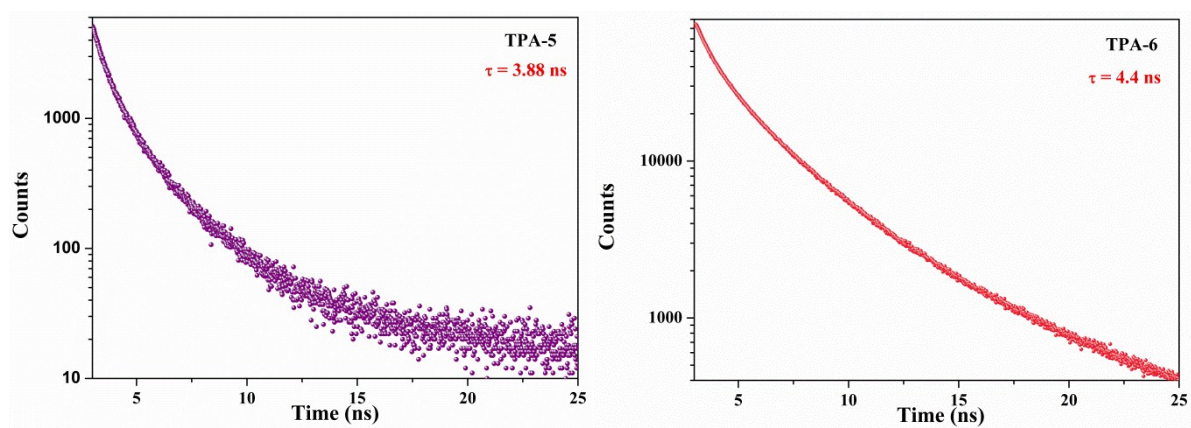

Fig. S18. Lifetime measurements of the TPA based organic dyes.

**DFT Analysis:**

**ST1: MO orbitals of TPA based organic dyes:**

| Orbital | TPA-1 | TPA-2 |
|---------|-------|-------|
| HOMO    |       |       |
| LUMO    |       |       |

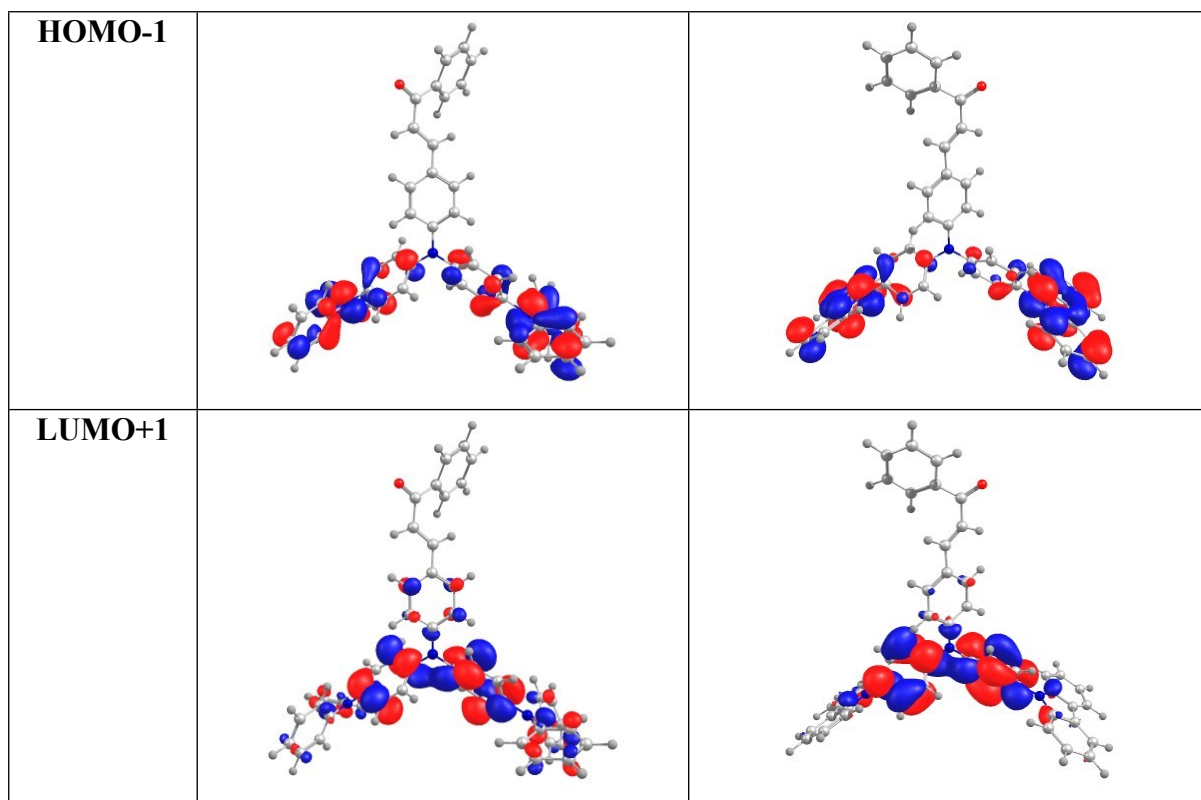

**Table ST2: MO orbitals of the TPA based organic dyes.**

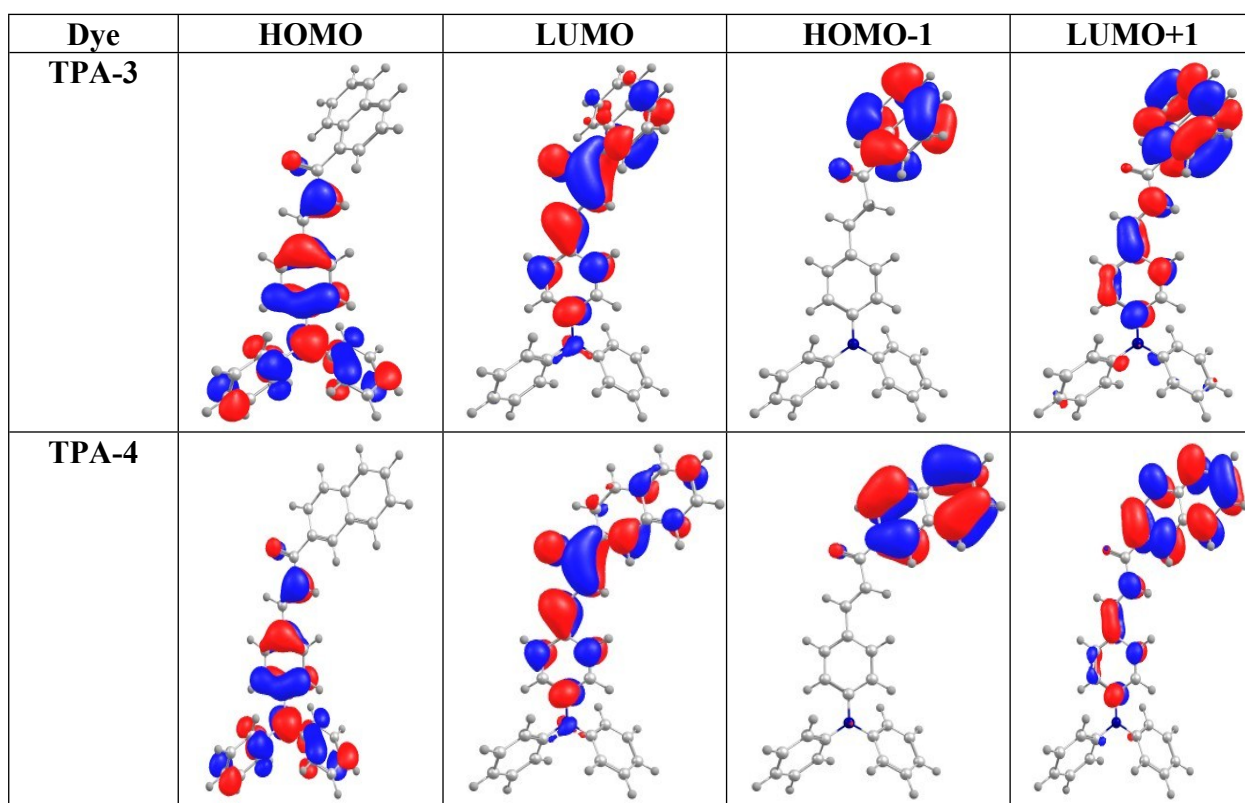



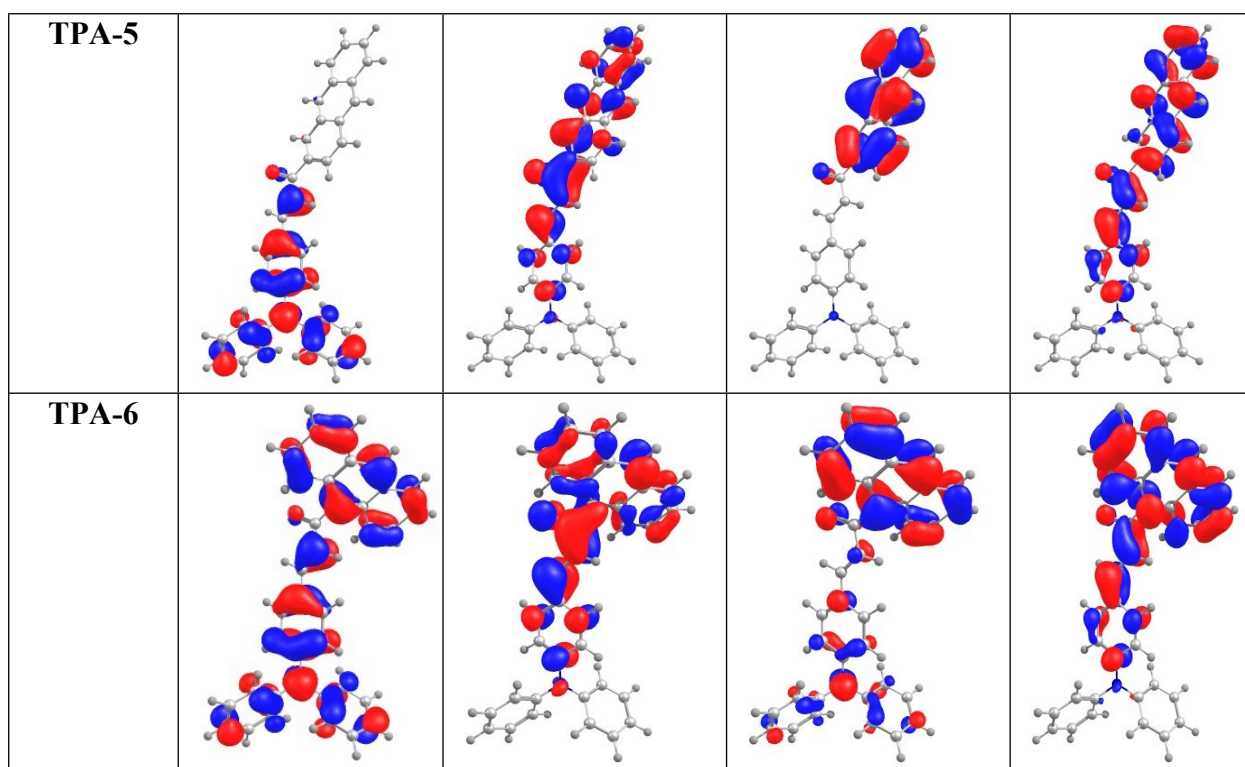

### ST3: Computed Vertical Transitions and Their Oscillator Strengths and Configurations<sup>a</sup>

| Compound | State    | $\lambda_{\max}$ (nm) | $f$    | Configuration                                                                                                    |
|----------|----------|-----------------------|--------|------------------------------------------------------------------------------------------------------------------|
| TPA-1    | DMSO     | 514.2                 | 0.5041 | HOMO $\rightarrow$ LUMO (70.4%)                                                                                  |
|          |          | 372.39                | 0.5461 | HOMO-2 $\rightarrow$ LUMO (68.99%)                                                                               |
|          |          | 366.03                | 0.6042 | HOMO $\rightarrow$ LUMO+2 (66.78%)                                                                               |
|          |          | 348.73                | 0.1635 | HOMO $\rightarrow$ LUMO+1 (26.59%)<br>HOMO $\rightarrow$ LUMO+3 (63.84%)                                         |
|          |          | 316.52                | 0.3121 | HOMO-2 $\rightarrow$ LUMO+5 (21.40%)<br>HOMO $\rightarrow$ LUMO+4 (49.39%)<br>HOMO $\rightarrow$ LUMO+5 (44.64%) |
|          | Methanol | 512.39                | 0.5401 | HOMO $\rightarrow$ LUMO (70.41%)                                                                                 |
|          |          | 371.49                | 0.5441 | HOMO-2 $\rightarrow$ LUMO (68.94%)                                                                               |
|          |          | 355.62                | 0.5769 | HOMO $\rightarrow$ LUMO+2 (66.62%)                                                                               |
|          |          | 348.56                | 0.1785 | HOMO $\rightarrow$ LUMO+1 (24.58%)<br>HOMO $\rightarrow$ LUMO+3 (64.18%)                                         |
|          |          | 316.11                | 0.2959 | HOMO-2 $\rightarrow$ LUMO+5 (20.53%)                                                                             |

|  |            |        |        |                                                                              |
|--|------------|--------|--------|------------------------------------------------------------------------------|
|  |            |        |        | HOMO → LUMO+4 (44.63%)<br>HOMO → LUMO+5 (49.58%)                             |
|  |            |        |        |                                                                              |
|  | THF        | 508.55 | 0.5556 | HOMO → LUMO (70.39%)                                                         |
|  |            | 369.72 | 0.5443 | HOMO-2 → LUMO (68.75%)                                                       |
|  |            | 356.40 | 0.6003 | HOMO → LUMO+2 (66.07%)                                                       |
|  |            | 349    | 0.1638 | HOMO → LUMO+1 (22.89%)<br>HOMO → LUMO+3 (64.89%)                             |
|  |            | 316.34 | 0.2758 | HOMO-2 → LUMO+5 (20.83%)<br>HOMO → LUMO+4 (26.89%)<br>HOMO → LUMO+5 (60.89%) |
|  |            |        |        |                                                                              |
|  | Toluene    | 497.49 | 0.5806 | HOMO → LUMO (70.33%)                                                         |
|  |            | 365.13 | 0.4455 | HOMO-9 → LUMO (12.84%)<br>HOMO-3 → LUMO (23.63%)<br>HOMO-2 → LUMO (62.94%)   |
|  |            | 360.12 | 0.1134 | HOMO-9 → LUMO (17.36%)<br>HOMO-4 → LUMO (19.68%)<br>HOMO-3 → LUMO (56.94%)   |
|  |            | 357.69 | 0.6280 | HOMO → LUMO+2 (58.63%)                                                       |
|  |            | 349.84 | 0.1144 | HOMO → LUMO+1 (20.47%)<br>HOMO → LUMO+3 (65.25%)                             |
|  |            | 317.37 | 0.1071 | HOMO → LUMO+5 (64.36%)                                                       |
|  |            | 316.76 | 0.2484 | HOMO-1 → LUMO+5 (21.48%)<br>HOMO → LUMO+4 (16.95%)<br>HOMO → LUMO+5 (64.29%) |
|  |            |        |        |                                                                              |
|  | Chloroform | 500.57 | 0.5645 | HOMO → LUMO (0.7037%)                                                        |
|  |            | 368.36 | 0.5406 | HOMO-2 → LUMO (68.46%)                                                       |
|  |            | 351.85 | 0.6107 | HOMO → LUMO+2 (65.21%)                                                       |
|  |            | 349.28 | 0.1562 | HOMO → LUMO+2 (22.05%)                                                       |

|  |              |        |        |                                                                              |
|--|--------------|--------|--------|------------------------------------------------------------------------------|
|  |              |        |        | HOMO → LUMO+4 (65.19%)                                                       |
|  |              | 316.49 | 0.2652 | HOMO-1 → LUMO+5 (21.20%)<br>HOMO → LUMO+4 (22.25%)<br>HOMO → LUMO+5 (62.67%) |
|  |              |        |        |                                                                              |
|  | Acetonitrile | 512.77 | 0.5426 | HOMO → LUMO (70.41%)                                                         |
|  |              | 371.68 | 0.5443 | HOMO-2 → LUMO (69.96%)                                                       |
|  |              | 355.69 | 0.5821 | HOMO → LUMO+2 (66.66%)                                                       |
|  |              | 348.58 | 0.1756 | HOMO → LUMO+2 (24.79%)<br>HOMO → LUMO+4 (64.68%)                             |
|  |              | 316.18 | 0.2991 | HOMO-1 → LUMO+5 (20.71%)<br>HOMO → LUMO+4 (45.80%)<br>HOMO → LUMO+5 (48.48%) |
|  |              |        |        |                                                                              |
|  | Acetone      | 511.98 | 0.5456 | HOMO → LUMO (70.41%)                                                         |
|  |              | 371.31 | 0.5447 | HOMO-2 → LUMO (68.93%)                                                       |
|  |              | 355.85 | 0.5868 | HOMO → LUMO+2 (66.58%)                                                       |
|  |              | 348.67 | 0.1728 | HOMO → LUMO+1 (24.36%)<br>HOMO → LUMO+3 (64.28%)                             |
|  |              | 316.22 | 0.2942 | HOMO-1 → LUMO+6 (20.43%)<br>HOMO → LUMO+5 (38.23%)<br>HOMO → LUMO+5 (54.60%) |
|  |              |        |        |                                                                              |
|  | DCM          | 509.89 | 0.5577 | HOMO → LUMO (70.39%)                                                         |
|  |              | 370.35 | 0.5450 | HOMO-1 → LUMO (68.82%)                                                       |
|  |              | 356.41 | 0.6061 | HOMO → LUMO+2 (66.27%)                                                       |
|  |              | 348.98 | 0.1615 | HOMO → LUMO+1 (23.45%)<br>HOMO → LUMO+3 (64.71%)                             |
|  |              | 316.44 | 0.2836 | HOMO-1 → LUMO+6 (20.80%)<br>HOMO → LUMO+5 (28.51%)<br>HOMO → LUMO+6 (60.12%) |



|              |              |        |        |                                                                                                                                    |
|--------------|--------------|--------|--------|------------------------------------------------------------------------------------------------------------------------------------|
|              | Gas          | 470.50 | 0.5027 | HOMO → LUMO (70.35%)                                                                                                               |
|              |              | 355.79 | 0.4308 | HOMO → LUMO+1 (68.46%)                                                                                                             |
|              |              | 350.55 | 0.5358 | HOMO-2 → LUMO (65.40%)                                                                                                             |
|              |              | 349.31 | 0.2568 | HOMO-2 → LUMO (13.80%)<br>HOMO → LUMO+2 (44.90%)<br>HOMO → LUMO+3 (50.32%)                                                         |
|              |              | 314.78 | 0.1648 | HOMO-1 → LUMO+6 (17.67%)<br>HOMO → LUMO+5 (17.67%)<br>HOMO → LUMO+6 (65.19%)                                                       |
|              |              |        |        |                                                                                                                                    |
| <b>TPA-2</b> | DCM          | 469    | 0.6277 | HOMO → LUMO (70.54%)                                                                                                               |
|              |              | 376    | 0.2696 | HOMO-2 → LUMO (69.17%)                                                                                                             |
|              |              | 334    | 0.704  | HOMO → LUMO+2 (54.42%)<br>HOMO → LUMO+3 (13.96%)                                                                                   |
|              |              | 319    | 0.1026 | HOMO-1 → LUMO+2 (17.10%)<br>HOMO-1 → LUMO+4 (10.50%)<br>HOMO → LUMO+1 (40.70%)<br>HOMO → LUMO+3 (50.07%)<br>HOMO → LUMO+5 (13.66%) |
|              |              |        |        |                                                                                                                                    |
|              | Acetone      | 470.41 | 0.623  | HOMO → LUMO (70.20%)                                                                                                               |
|              |              | 376.35 | 0.2675 | HOMO-2 → LUMO (69.77%)                                                                                                             |
|              |              | 333    | 0.6969 | HOMO → LUMO+1 (13.3%)<br>HOMO → LUMO+4 (51.84%)                                                                                    |
|              |              |        |        |                                                                                                                                    |
|              | Acetonitrile | 470.98 | 0.622  | HOMO → LUMO (70.21%)                                                                                                               |
|              |              | 376.39 | 0.2656 | HOMO-2 → LUMO (69.87%)                                                                                                             |
|              |              | 333.23 | 0.6949 | HOMO → LUMO+1 (12.40%)<br>HOMO → LUMO+4 (54.60%)                                                                                   |
|              |              |        |        |                                                                                                                                    |

|  |            |        |        |                                                                                                                                |
|--|------------|--------|--------|--------------------------------------------------------------------------------------------------------------------------------|
|  | Chloroform | 466.13 | 0.622  | HOMO → LUMO (70.13%)                                                                                                           |
|  |            | 376.07 | 0.2236 | HOMO-2 → LUMO (62.48%)                                                                                                         |
|  |            | 335    | 0.703  | HOMO → LUMO+1 (30.10%)<br>HOMO → LUMO+2 (60.11%)<br>HOMO → LUMO+4 (13.13%)                                                     |
|  |            | 318.71 | 0.1312 | HOMO-1 → LUMO+4 (11.30%)<br>HOMO → LUMO+1 (42.73%)<br>HOMO → LUMO-3 (43.12%)<br>HOMO → LUMO+4 (12.9%)<br>HOMO → LUMO+5 (15.8%) |
|  |            |        |        |                                                                                                                                |
|  | DMSO       | 472.27 | 0.6358 | HOMO → LUMO (70.19%)                                                                                                           |
|  |            | 376.76 | 0.2642 | HOMO-3 → LUMO (69.88%)                                                                                                         |
|  |            | 333.55 | 0.7068 | HOMO → LUMO+1 (11.97%)<br>HOMO → LUMO+4 (55.53%)                                                                               |
|  |            |        |        |                                                                                                                                |
|  | Methanol   | 470.65 | 0.1696 | HOMO → LUMO (70.72%)                                                                                                           |
|  |            | 376.30 | 0.2660 | HOMO-2 → LUMO (69.86%)                                                                                                         |
|  |            | 333.17 | 0.6922 | HOMO → LUMO+1 (12.61%)<br>HOMO → LUMO+4 (54.29%)                                                                               |
|  |            |        |        |                                                                                                                                |
|  | THF        | 468.05 | 0.6225 | HOMO → LUMO (70.17%)                                                                                                           |
|  |            | 376.09 | 0.268  | HOMO-2 → LUMO (68.60%)                                                                                                         |
|  |            | 314.35 | 0.7010 | HOMO → LUMO+1 (19.19%)<br>HOMO → LUMO+2 (57.70%)<br>HOMO → LUMO+4 (30.21%)                                                     |
|  |            | 319.50 | 0.1077 | HOMO-1 → LUMO+4 (11.55%)<br>HOMO → LUMO+1 (41.25%)<br>HOMO → LUMO+3 (49.44%)<br>HOMO → LUMO+5 (13.90%)                         |
|  |            |        |        |                                                                                                                                |

|              |              |        |        |                                                                              |
|--------------|--------------|--------|--------|------------------------------------------------------------------------------|
|              | Toluene      | 461.17 | 0.6154 | HOMO → LUMO (70.07%)                                                         |
|              |              | 373.72 | 0.3006 | HOMO-5 → LUMO (16.70%)<br>HOMO-3 → LUMO (67.76%)                             |
|              |              | 336.84 | 0.7002 | HOMO → LUMO+1 (65.53%)<br>HOMO → LUMO+2 (22.70%)                             |
|              | Gas          | 442.98 | 0.4768 | HOMO → LUMO (70.22%)                                                         |
|              |              | 366.47 | 0.3596 | HOMO-2 → LUMO (69.47%)<br>HOMO → LUMO+1 (69.15%)                             |
|              |              | 336.82 | 0.5633 | HOMO → LUMO+1 (23.5 %)                                                       |
|              |              | 313.24 | 0.1597 | HOMO → LUMO+2 (23.5 %)<br>HOMO → LUMO+3 (56.33 %)<br>HOMO → LUMO+4 (14.31 %) |
| <b>TPA-3</b> | Acetone      | 466    | 0.869  | HOMO → LUMO (70.04%)                                                         |
|              |              | 374    | 0.1062 | HOMO-4 → LUMO (32.62%)<br>HOMO-3 → LUMO (53.7%)<br>HOMO-2 → LUMO (18.4%)     |
|              |              | 366    | 0.128  | HOMO-4 → LUMO (16.5%)<br>HOMO-3 → LUMO (19.7%)<br>HOMO-2 → LUMO (65.08%)     |
|              | Acetonitrile | 467    | 0.865  | HOMO → LUMO (70.04%)                                                         |
|              |              | 374    | 0.107  | HOMO-4 → LUMO (33.6%)<br>HOMO-3 → LUMO (52.8%)<br>HOMO-2 → LUMO (17.3%)      |
|              |              | 366    | 0.129  | HOMO-4 → LUMO (11.7%)<br>HOMO-3 → LUMO (20.6%)<br>HOMO-2 → LUMO (64.5%)      |

|  |                   |       |       |                                                                          |
|--|-------------------|-------|-------|--------------------------------------------------------------------------|
|  | CHCl <sub>3</sub> | 462   | 0.895 | HOMO → LUMO (69.96%)                                                     |
|  |                   | 378   | 0.13  | HOMO-4 → LUMO (25.5%)<br>HOMO-3 → LUMO (54.9%)<br>HOMO-2 → LUMO (29.9%)  |
|  |                   | 367   | 0.117 | HOMO-3 → LUMO (14.5%)<br>HOMO-1 → LUMO (67.3%)                           |
|  | DCM               | 465.5 | 0.885 | HOMO → LUMO (70%)                                                        |
|  |                   | 376.5 | 0.35  | HOMO-4 → LUMO (29.5%)<br>HOMO-3 → LUMO (55.4%)<br>HOMO-2 → LUMO (22.18%) |
|  |                   | 366.9 | 0.125 | HOMO-3 → LUMO (17.5%)<br>HOMO-1 → LUMO (66.2%)                           |
|  | DMSO              | 469.1 | 0.879 | HOMO → LUMO (70%)                                                        |
|  |                   | 374   | 0.100 | HOMO-4 → LUMO (33.8%)<br>HOMO-3 → LUMO (52.2%)<br>HOMO-2 → LUMO (11.9%)  |
|  |                   | 366   | 0.129 | HOMO-4 → LUMO (12.5%)<br>HOMO-3 → LUMO (21.6%)<br>HOMO-2 → LUMO (64.1%)  |
|  | Gas               | 431   | 0.812 | HOMO → LUMO (69.9%)                                                      |
|  |                   | 390.4 | 0.100 | HOMO-4 → LUMO (13.6%)<br>HOMO-2 → LUMO (65.2%)                           |
|  |                   | 366   | 0.59  | HOMO → LUMO (68.7%)                                                      |

|              |         |        |        |                                                                           |
|--------------|---------|--------|--------|---------------------------------------------------------------------------|
|              | MeOH    | 466    | 0.862  | HOMO → LUMO (70.04%)                                                      |
|              |         | 324.5  | 0.107  | HOMO-4 → LUMO (33.5%)<br>HOMO-3 → LUMO (53.03%)<br>HOMO-2 → LUMO (17.4%)  |
|              |         | 366.3  | 0.1289 | HOMO-4 → LUMO (11.5%)<br>HOMO-3 → LUMO (20.4%)<br>HOMO-2 → LUMO (64.6%)   |
|              | THF     | 464.2  | 0.883  | HOMO → LUMO (70.0%)                                                       |
|              |         | 377.02 | 0.1027 | HOMO-4 → LUMO (28.5%)<br>HOMO-3 → LUMO (55.6%)<br>HOMO-2 → LUMO (23.7%)   |
|              |         | 366.8  | 0.123  | HOMO-3 → LUMO (16.6%)<br>HOMO-2 → LUMO (66.6%)                            |
|              | Toluene | 456.45 | 0.915  | HOMO → LUMO (69.8%)                                                       |
|              |         | 382.7  | 0.102  | HOMO-4 → LUMO (20.01%)<br>HOMO-3 → LUMO (42.69%)<br>HOMO-2 → LUMO (49.5%) |
|              |         | 367.66 | 0.103  | HOMO-3 → LUMO (10.06%)<br>HOMO-1 → LUMO (68.3%)                           |
| <b>TPA-4</b> | Acetone | 467.9  | 0.825  | HOMO → LUMO (70.2%)                                                       |
|              |         | 366.7  | 0.104  | HOMO-4 → LUMO (50.1%)<br>HOMO-3 → LUMO (41.17%)                           |
|              |         | 362.5  | 0.164  | HOMO-4 → LUMO (20.7%)                                                     |

|  |                   |        |       |                                                                           |
|--|-------------------|--------|-------|---------------------------------------------------------------------------|
|  |                   |        |       | HOMO-1 → LUMO (64.6%)                                                     |
|  | Acetonitrile      | 468.56 | 0.822 | HOMO → LUMO (70.23%)                                                      |
|  |                   | 366.2  | 0.107 | HOMO-6 → LUMO (13.1%)<br>HOMO-4 → LUMO (47.8%)<br>HOMO-1 → LUMO (39.5%)   |
|  |                   | 362.7  | 0.193 | HOMO-4 → LUMO (23.6%)<br>HOMO-1 → LUMO (62.8%)                            |
|  | CHCl <sub>3</sub> | 463.2  | 0.844 | HOMO → LUMO (70.19%)                                                      |
|  |                   | 370.56 | 0.100 | HOMO-4 → LUMO (46.8%)<br>HOMO-3 → LUMO (49.7%)                            |
|  |                   | 360.96 | 0.197 | HOMO-4 → LUMO (11.3%)<br>HOMO-1 → LUMO (67.5%)                            |
|  | DCM               | 466.66 | 0.838 | HOMO → LUMO (70.2%)                                                       |
|  |                   | 368.24 | 0.108 | HOMO-4 → LUMO (50.4%)<br>HOMO-3 → LUMO (44.9%)                            |
|  |                   | 362.0  | 0.198 | HOMO-4 → LUMO (14.9%)<br>HOMO-1 → LUMO (66.69%)                           |
|  | DMSO              | 470.3  | 0.835 | HOMO → LUMO (70.22%)                                                      |
|  |                   | 366.13 | 0.105 | HOMO-6 → LUMO (14.7%)<br>HOMO-4 → LUMO (45.95%)<br>HOMO-3 → LUMO (38.59%) |
|  |                   | 362.98 | 0.192 | HOMO-4 → LUMO (25.6%)                                                     |

|  |          |        |        |                                                                         |
|--|----------|--------|--------|-------------------------------------------------------------------------|
|  |          |        |        | HOMO-3 → LUMO (11.35%)<br>HOMO-1 → LUMO (61.54%)                        |
|  | Gas      | 432.63 | 0.7481 | HOMO → LUMO (70.1%)                                                     |
|  |          | 382.86 | 0.103  | HOMO-4 → LUMO (24.5%)<br>HOMO-2 → LUMO (60.93%)                         |
|  |          | 354.54 | 0.158  | HOMO-1 → LUMO (67.79%)                                                  |
|  | Methanol | 468.1  | 0.819  | HOMO → LUMO (70.23%)                                                    |
|  |          | 366.28 | 0.164  | HOMO-6 → LUMO (12.5%)<br>HOMO-4 → LUMO (48.4%)<br>HOMO-3 → LUMO (39.7%) |
|  |          | 362.62 | 0.193  | HOMO-4 → LUMO (23.12%)<br>HOMO-1 → LUMO (63.24%)                        |
|  | THF      | 465.3  | 0.835  | HOMO → LUMO (70.21%)                                                    |
|  |          | 368.7  | 0.104  | HOMO-4 → LUMO (49.8%)<br>HOMO-3 → LUMO (46.1%)                          |
|  |          | 361.69 | 0.198  | HOMO-4 → LUMO (13.7%)<br>HOMO-1 → LUMO (66.9%)                          |
|  | Toluene  | 457.3  | 0.858  | HOMO → LUMO (70.1%)                                                     |
|  |          | 374.7  | 0.102  | HOMO-4 → LUMO (38.1%)<br>HOMO-3 → LUMO (55.2%)<br>HOMO-2 → LUMO (16.8%) |
|  |          | 359.1  | 0.192  | HOMO-1 → LUMO (68.06%)                                                  |

|              |              |        |        |                                                                                                        |
|--------------|--------------|--------|--------|--------------------------------------------------------------------------------------------------------|
| <b>TPA-5</b> | Gas          | 458.2  | 0.786  | HOMO-1 → LUMO (20.68%)<br>HOMO → LUMO (67.15%)                                                         |
|              |              | 441.03 | 0.191  | HOMO-1 → LUMO (66.45%)                                                                                 |
|              |              | 394.84 | 0.103  | HOMO-4 → LUMO (15.5%)<br>HOMO-2 → LUMO (65.03%)<br>HOMO-2 → LUMO+1 (15.27%)                            |
|              | Acetone      | 495.0  | 0.9168 | HOMO-1 → LUMO (10.21%)<br>HOMO → LUMO (69.65%)                                                         |
|              |              | 456.2  | 0.120  | HOMO-1 → LUMO (69.18%)                                                                                 |
|              |              | 383.21 | 0.2908 | HOMO → LUMO+1 (69.24%)                                                                                 |
|              | Acetonitrile | 495.8  | 0.9132 | HOMO-1 → LUMO (10.09%)<br>HOMO → LUMO (69.58%)                                                         |
|              |              | 456.6  | 0.120  | HOMO-1 → LUMO (69.2%)                                                                                  |
|              |              | 383.46 | 0.290  | HOMO → LUMO+1 (69.28%)                                                                                 |
|              | Chloroform   | 489.08 | 0.9368 | HOMO-1 → LUMO (11.17%)<br>HOMO → LUMO (69.32%)                                                         |
|              |              | 453.38 | 0.159  | HOMO-1 → LUMO (69.32%)                                                                                 |
|              |              | 381.78 | 0.172  | HOMO-4 → LUMO (50.31%)<br>HOMO-4 → LUMO+1 (11.77%)<br>HOMO-3 → LUMO (30.17%)<br>HOMO → LUMO+1 (34.06%) |
|              | DCM          | 493.2  | 0.9317 | HOMO-1 → LUMO (10.56%)                                                                                 |



|              |         |        |        |                                                                             |
|--------------|---------|--------|--------|-----------------------------------------------------------------------------|
|              |         |        |        | HOMO → LUMO (69.45%)                                                        |
|              |         | 455.21 | 0.186  | HOMO-1 → LUMO (69.16%)                                                      |
|              |         | 382.59 | 0.292  | HOMO → LUMO+1 (69.04%)                                                      |
|              | DMSO    | 497.55 | 0.9294 | HOMO-1 → LUMO (10.00%)<br>HOMO → LUMO (69.57%)                              |
|              |         | 457.25 | 0.121  | HOMO-1 → LUMO (69.24%)                                                      |
|              |         | 383.94 | 0.288  | HOMO → LUMO+1 (69.29%)                                                      |
|              | THF     | 491.33 | 0.9279 | HOMO-1 → LUMO (10.72%)<br>HOMO → LUMO (69.43%)                              |
|              |         | 454.61 | 0.178  | HOMO-1 → LUMO (69.12%)                                                      |
|              |         | 382.18 | 0.292  | HOMO → LUMO+1 (68.85%)                                                      |
|              | Toluene | 482.25 | 0.948  | HOMO-1 → LUMO (12.48%)<br>HOMO → LUMO (69.03%)                              |
|              |         | 450.44 | 0.110  | HOMO-1 → LUMO (68.84%)                                                      |
|              |         | 386.1  | 0.1060 | HOMO-4 → LUMO (41.03%)<br>HOMO-3 → LUMO (53.42%)<br>HOMO-3 → LUMO+1 (11.6%) |
| <b>TPA-6</b> | Acetone | 491.2  | 0.722  | HOMO-1 → LUMO (24.85%)<br>HOMO → LUMO (65.76%)                              |
|              |         | 447.9  | 0.383  | HOMO-1 → LUMO (63.3%)<br>HOMO → LUMO (25.32%)                               |
|              |         | 392.31 | 0.238  | HOMO-1 → LUMO (13.06%)                                                      |

|  |                   |        |        |                                                  |
|--|-------------------|--------|--------|--------------------------------------------------|
|  |                   |        |        | HOMO → LUMO+1 (68.70%)                           |
|  | Acetonitrile      | 491.77 | 0.721  | HOMO-1 → LUMO (24.57%)<br>HOMO → LUMO (65.88%)   |
|  |                   | 448.11 | 0.135  | HOMO-1 → LUMO (63.38%)                           |
|  |                   | 392.76 | 0.2392 | HOMO-1 → LUMO (13.20%)<br>HOMO → LUMO+1 (68.67%) |
|  | CHCl <sub>3</sub> | 497.54 | 0.7208 | HOMO-1 → LUMO (26.74%)<br>HOMO → LUMO (64.89%)   |
|  |                   | 446.18 | 0.1618 | HOMO-1 → LUMO (62.76%)                           |
|  |                   | 388.96 | 0.2313 | HOMO-1 → LUMO (12.30%)<br>HOMO → LUMO+1 (68.90%) |
|  | DCM               | 490.18 | 0.729  | HOMO-1 → LUMO (25.53%)<br>HOMO → LUMO (65.44%)   |
|  |                   | 447.41 | 0.147  | HOMO-1 → LUMO (63.18%)                           |
|  |                   | 391.15 | 0.2357 | HOMO-1 → LUMO (12.59%)<br>HOMO → LUMO+1 (68.63%) |
|  | DMSO              | 492.17 | 0.7201 | HOMO-1 → LUMO (24.36%)<br>HOMO → LUMO (65.97%)   |
|  |                   | 448.27 | 0.134  | HOMO-1 → LUMO (63.43%)                           |
|  |                   | 393.11 | 0.2396 | HOMO-1 → LUMO (13.32%)<br>HOMO → LUMO (68.64%)   |
|  | Gas               | 469.67 | 0.4415 | HOMO → LUMO (63.03%)                             |

|  |          |        |        |                                                                       |
|--|----------|--------|--------|-----------------------------------------------------------------------|
|  |          | 431.5  | 0.2216 | HOMO-1 → LUMO (60.5%)<br>HOMO → LUMO (31.3%)<br>HOMO → LUMO+1 (15.2%) |
|  | Methanol | 491.38 | 0.7176 | HOMO-1 → LUMO (24.67%)<br>HOMO → LUMO (65.84%)                        |
|  |          | 447.97 | 0.135  | HOMO-1 → LUMO (63.31%)                                                |
|  |          | 392.57 | 0.2396 | HOMO-1 → LUMO (13.26%)<br>HOMO → LUMO+1 (68.64%)                      |
|  | THF      | 489.15 | 0.7229 | HOMO-1 → LUMO (25.93%)<br>HOMO → LUMO (65.28%)                        |
|  |          | 446.97 | 0.1495 | HOMO-1 → LUMO (63.01%)                                                |
|  |          | 390.46 | 0.2356 | HOMO-1 → LUMO (12.60%)<br>HOMO → LUMO+1 (68.82%)                      |
|  | Toluene  | 483.64 | 0.6955 | HOMO-1 → LUMO (28.33%)<br>HOMO → LUMO (64.09%)                        |
|  |          | 443.81 | 0.1024 | HOMO-1 → LUMO (62.20%)                                                |
|  |          | 385.22 | 0.2114 | HOMO-1 → LUMO (12.24%)<br>HOMO → LUMO+1 (68.80%)                      |

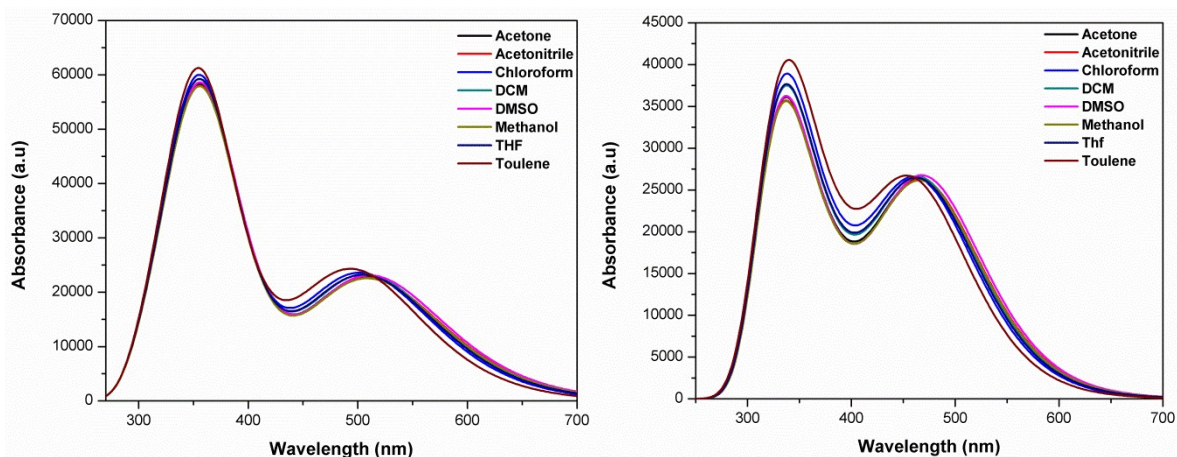

**Fig. S19.** Theoretical UV-Vis spectra of TPA-1 (left) and TPA-2 (right).

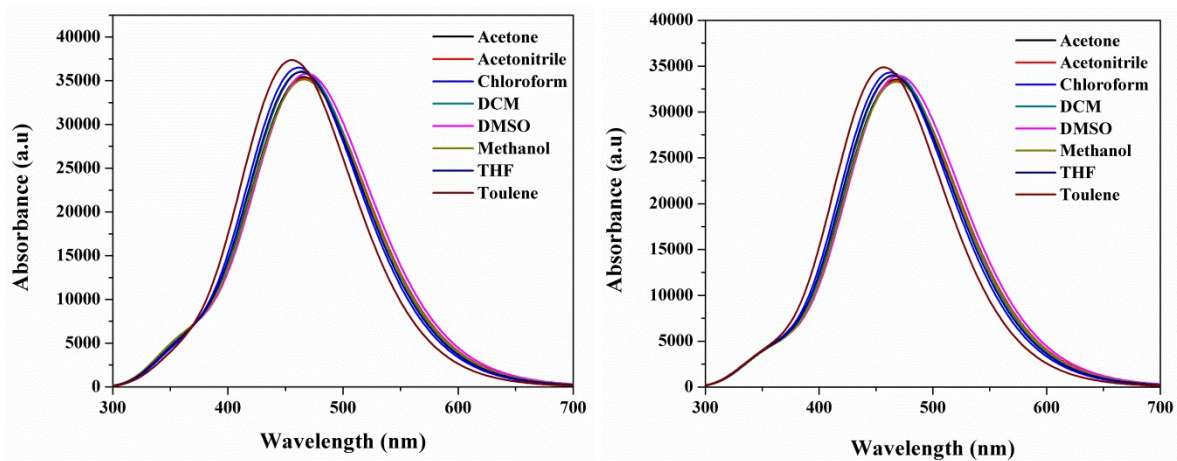

**Fig. S20.** Theoretical UV-Visible spectra of TPA-1-NP and TPA-2-NP

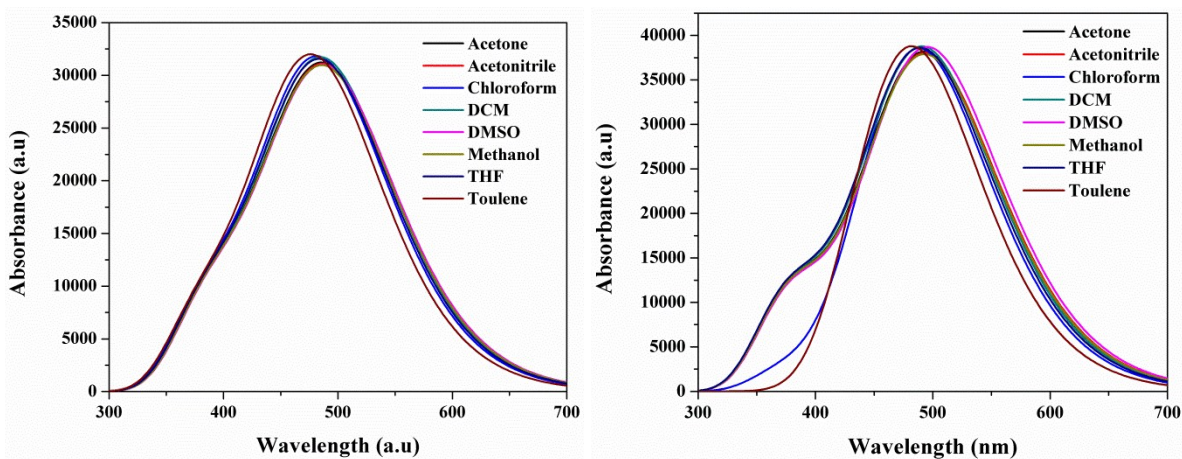

**Fig. S21.** Theoretical UV-Visible spectra of TPA-9-AP and TPA-2-AP

### 3. Solvatochromism studies:

The fluorescence excitation and emission spectra of organic dyes in different polar and non-polar solvents are given in Fig. S19 - S24, respectively. It clearly demonstrates that the significant solvent dependent shifts were observed in the emission maxima. Table ST4 and ST, summarizes the absorption maxima and Stoke's shift of all the yellowish – Orange dyes. However, solvent polarity exerts a great effect on their PL emission. With the increase of the solvent polarity gradually, the PL spectrum of each compound is progressively shifted to a longer wavelength. The excitation peaks of TPA-1 and TPA-2 are 375 and 383 nm in toluene and 429, 433 nm in DMF. Compared with the emission peak in a toluene solution, the peak positions in DMF are red-shifted by 50 nm in both TPA-1 and TPA-2, respectively. Solvent-dependent spectral shifts are often interpreted in terms of the Lippert–Mataga equation (eq-1), which describes the solvatochromic Stokes shift  $\Delta f$  (expressed in wavenumbers) as a function of the change of the dipole moment  $\Delta\mu_{ge} = \mu_e - \mu_g$  of the dye material upon excitation. The validity of equation-1 can be checked by using various solvents with different dielectric constants ( $\epsilon$ ) and refractive indices ( $n$ ) and by plotting Stokes shift versus  $\Delta f$  for the 7 solvents.

1,2

$$\Delta V = \frac{2\Delta f}{4\pi\epsilon_0 h c a^3} (\mu_e - \mu_g) + \text{Constant} \dots\dots\dots \text{eq.1}$$

$$f(\epsilon) = \frac{f(\epsilon - 1)}{f(2\epsilon + 1)} \quad \text{and} \quad f(n^2) = \frac{(n^2 - 1)}{(2n^2 + 1)} \dots\dots\dots \text{eq.2}$$

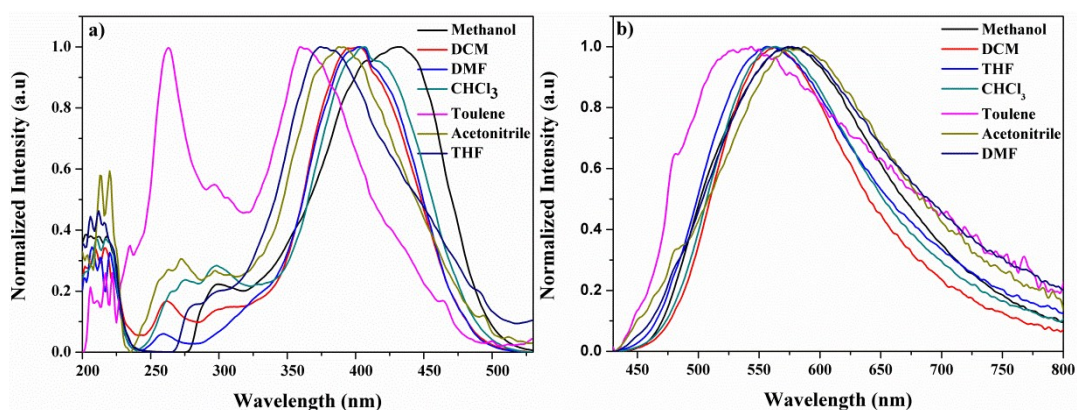

**Fig. S22.** Normalized excitation (a) and emission spectra (b) of TPA-1 in solvents of different polarity.



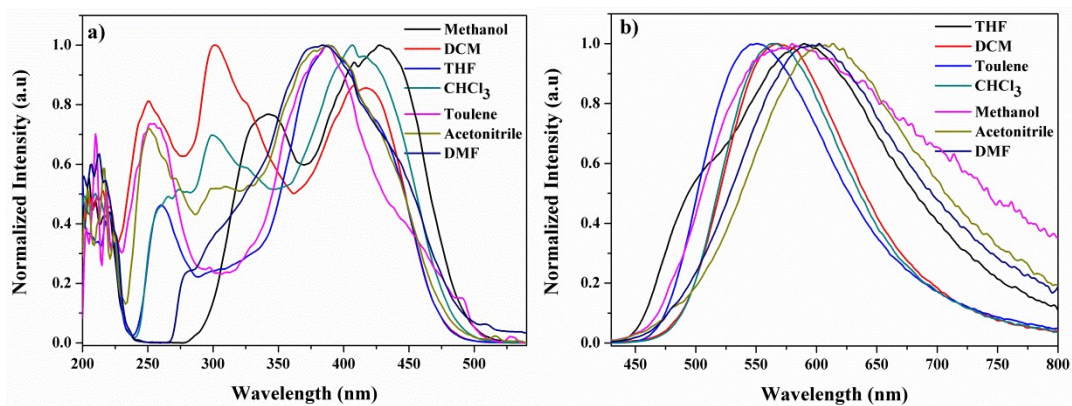

**Fig. S23.** Normalized excitation (a) and emission spectra (b) of TPA-2 in solvents of different polarity.

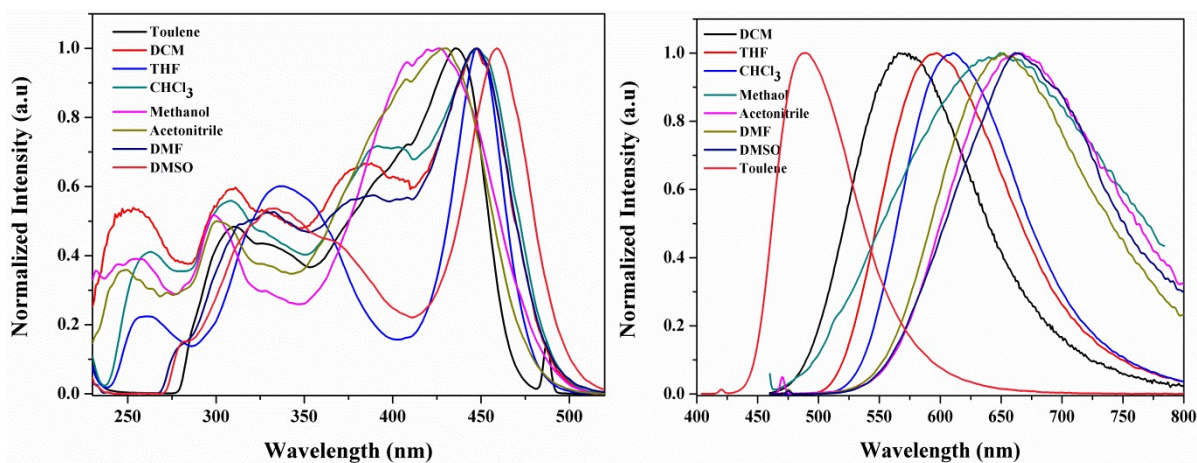

**Fig. S24.** Excitation and emission spectra of TPA-3 in different solvents.

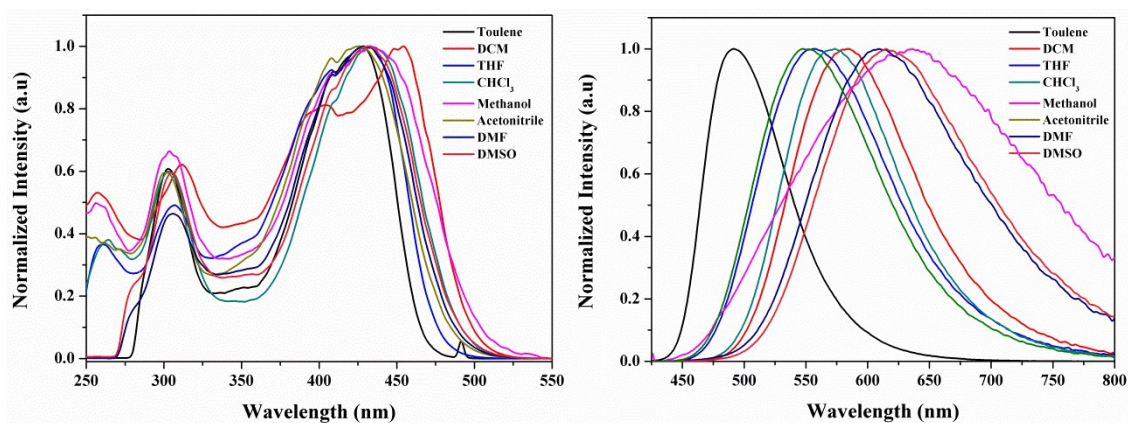

**Fig. S25.** Excitation and emission spectra of TPA-4 in different solvents.

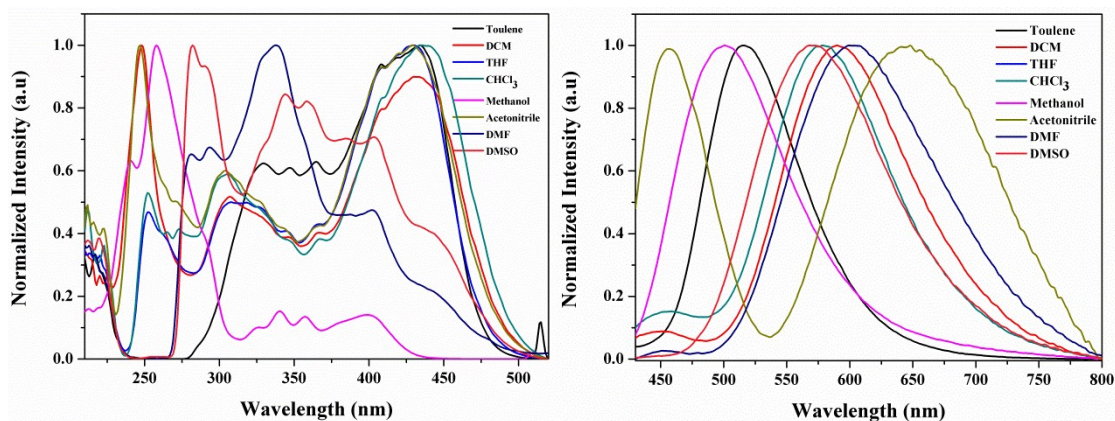

Fig. S23. Excitation and emission spectra of TPA-5 in different solvents.

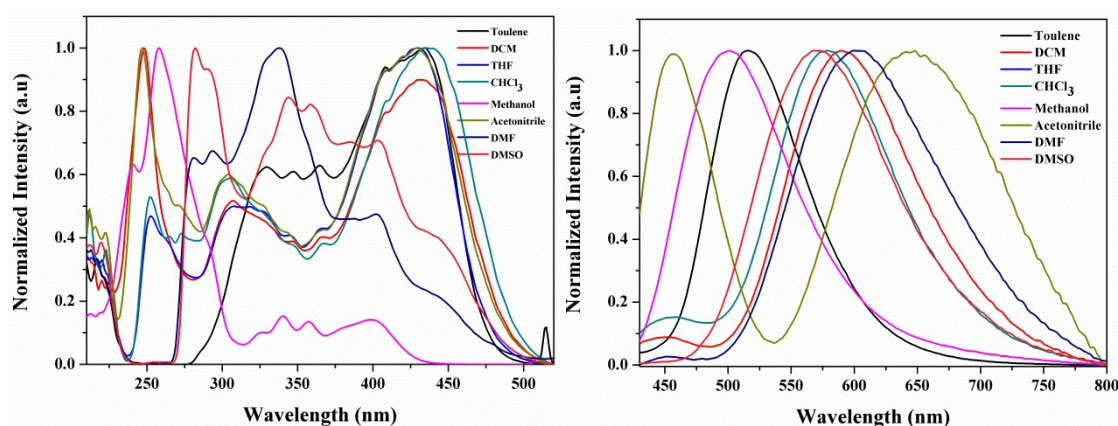

Fig. S26. Excitation and emission spectra of TPA-6 in different solvents.

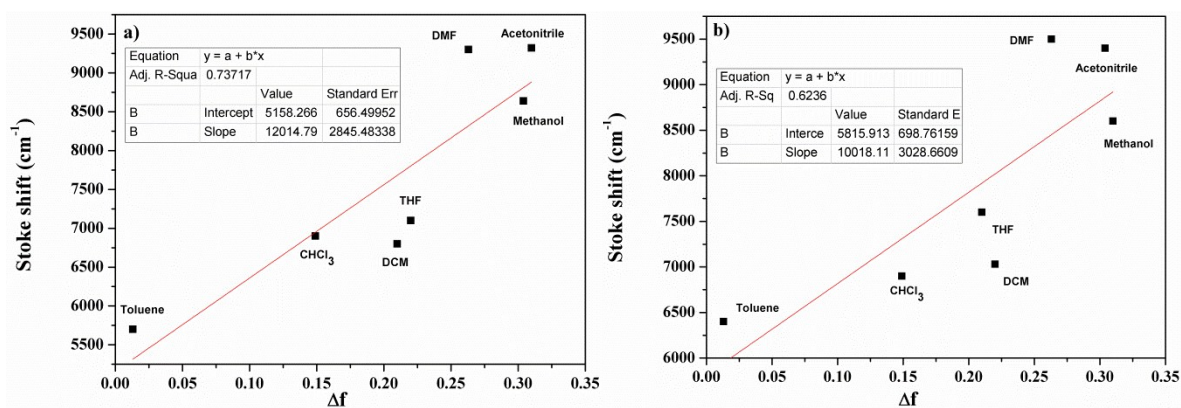

Fig. S27. Lippert-Mataga plots of TPA-1 (a) and TPA-2 (b).



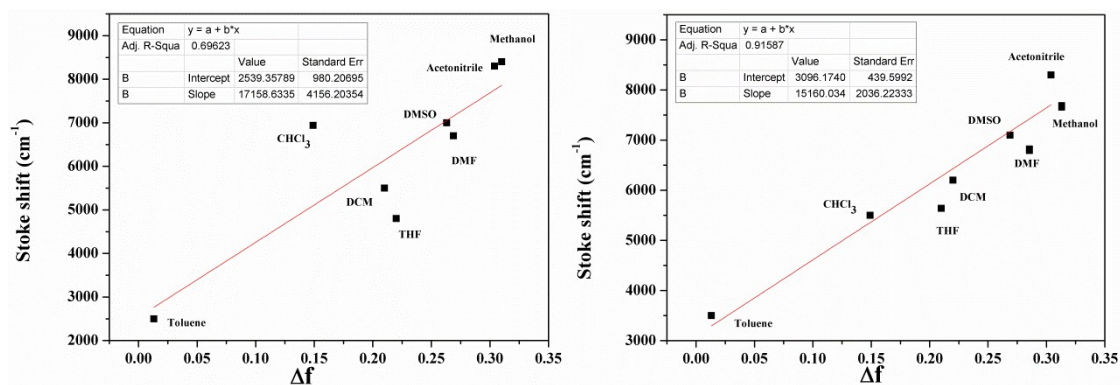

Fig. S28. Lippert–Mataga plots of TPA-3 (left) and TPA-4 (right) in different solvents.

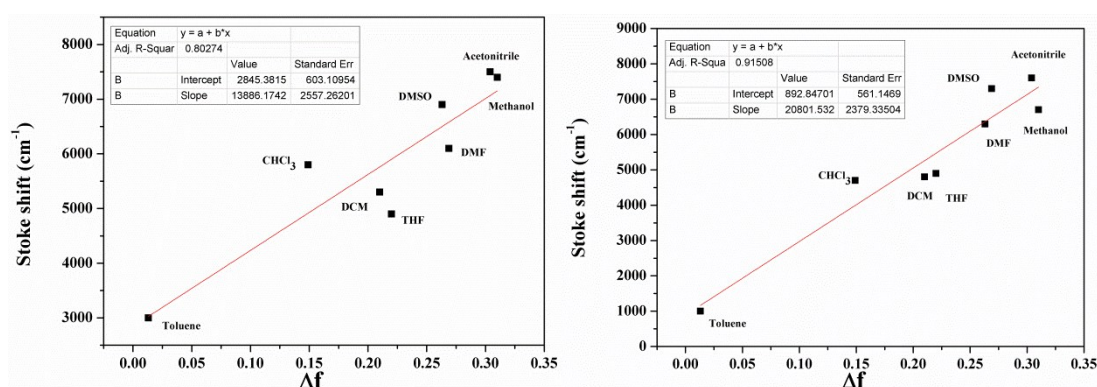

Fig. S29. Lippert–Mataga plots of TPA-5 (left) and TPA-6 (right) in different solvents.

Fig S25 – S27 represents the Lippert–Mataga plot for TPA-1 - TPA-6 in different solvents which are mentioned in the supplementary information (ST4 and ST5). All the organic dyes are showing good linear ship relation.

#### ST 4: Photoluminescence spectral data of various solvents of TPA based organic dyes.

| Solvent           | $\lambda_{em}$ (max) (nm) |       | Stoke's shift ( $\Delta\nu$ ) ( $cm^{-1}$ ) |       |
|-------------------|---------------------------|-------|---------------------------------------------|-------|
|                   | TPA-1                     | TPA-2 | TPA-1                                       | TPA-2 |
| Toulene           | 375                       | 383   | 6400                                        | 5700  |
| CHCl <sub>3</sub> | 406                       | 406   | 6900                                        | 6900  |
| THF               | 403                       | 389   | 7600                                        | 6800  |
| DCM               | 403                       | 406   | 7030                                        | 7100  |
| DMF               | 433                       | 429   | 9500                                        | 9300  |
| Acetonitrile      | 389                       | 389   | 9400                                        | 8640  |
| Methanol          | 358                       | 387   | 8600                                        | 9320  |



**ST 5: Photoluminescence spectral data of various solvents of TPA based organic dyes.**

| Solvent           | $\lambda_{em}$ (max) (nm) |       |       |       | Stoke's shift ( $\Delta\nu$ ) (cm <sup>-1</sup> ) |       |       |       |
|-------------------|---------------------------|-------|-------|-------|---------------------------------------------------|-------|-------|-------|
|                   | TPA-3                     | TPA-4 | TPA-5 | TPA-6 | TPA-3                                             | TPA-4 | TPA-5 | TPA-6 |
| Toulene           | 475                       | 476   | 515   | 505   | 2450                                              | 3000  | 3600  | 1900  |
| CHCl <sub>3</sub> | 611                       | 574   | 564   | 578   | 6940                                              | 5500  | 5500  | 4700  |
| THF               | 595                       | 561   | 540   | 574   | 5500                                              | 5300  | 5640  | 4800  |
| DCM               | 572                       | 582   | 582   | 590   | 4800                                              | 4900  | 6200  | 4900  |
| DMF               | 653                       | 609   | 606   | 606   | 7000                                              | 6900  | 6200  | 6300  |
| Acetonitrile      | 671                       | 625   | 628   | 666   | 8300                                              | 7500  | 8300  | 7600  |
| Methanol          | 665                       | 636   | 602   | 628   | 8400                                              | 7400  | 7600  | 6700  |
| DMSO              | 662                       | 617   | 632   | 624   | 6700                                              | 6900  | 7500  | 7300  |

**4. CIE Color Coordinates**

The Commission International del'Eclairage (CIE) chromaticity coordinates of the synthesized dyes and the corresponding emission intensities are tabulated below.

**ST6. CIE color coordinates of hybrid LEDs at different concentrations of TPA based organic dyes.**

| TPA-Acetophenone |             |             | TPA-1       |             | TPA-2       |             |
|------------------|-------------|-------------|-------------|-------------|-------------|-------------|
| Connc.           | x           | y           | x           | y           | x           | y           |
| 0.01             | 0.23        | 0.32        | 0.31        | 0.37        | 0.22        | 0.25        |
| 0.02             | 0.23        | 0.34        | 0.34        | 0.40        | 0.24        | 0.28        |
| 0.04             | <b>0.24</b> | <b>0.46</b> | 0.33        | 0.39        | 0.36        | 0.39        |
| 0.06             | 0.20        | 0.30        | <b>0.31</b> | <b>0.36</b> | <b>0.32</b> | <b>0.33</b> |
| 0.08             | 0.26        | 0.40        | 0.33        | 0.38        | 0.37        | 0.42        |
| 0.1              | 0.28        | 0.43        | 0.32        | 0.38        | 0.30        | 0.31        |

**ST7. CIE color coordinates of hybrid LEDs at different concentrations of TPA based organic dyes.**

| TPA-3 |      |      | TPA-4 |      | TPA-5       |             | TPA-6       |             |
|-------|------|------|-------|------|-------------|-------------|-------------|-------------|
| Conc. | x    | y    | x     | y    | x           | y           | x           | y           |
| 0.01  | 0.21 | 0.32 | 0.24  | 0.43 | 0.27        | 0.33        | 0.23        | 0.30        |
| 0.02  | 0.21 | 0.33 | 0.25  | 0.44 | 0.26        | 0.32        | 0.24        | 0.34        |
| 0.04  | 0.21 | 0.34 | 0.29  | 0.44 | <b>0.28</b> | <b>0.33</b> | <b>0.26</b> | <b>0.34</b> |
| 0.06  | 0.23 | 0.37 | 0.28  | 0.45 | 0.25        | 0.34        | 0.27        | 0.39        |
| 0.08  | 0.23 | 0.37 | 0.28  | 0.50 | 0.27        | 0.34        | 0.27        | 0.40        |
| 0.10  | 0.23 | 0.38 | 0.28  | 0.51 | 0.28        | 0.38        | 0.28        | 0.41        |

**ST 8: CIE color coordinates of all TPA based organic dyes in different solvents.**

| Solvent                 | TPA-1 |      | TPA-2 |      | TPA-3 |      | TPA-4 |      | TPA-5 |      | TPA-6 |      |
|-------------------------|-------|------|-------|------|-------|------|-------|------|-------|------|-------|------|
|                         | x     | y    | x     | y    | x     | y    | x     | y    | x     | y    | x     | y    |
| <b>Toulene</b>          | 0.42  | 0.47 | 0.43  | 0.50 | 0.17  | 0.39 | 0.18  | 0.41 | 0.42  | 0.47 | 0.21  | 0.41 |
| <b>DCM</b>              | 0.44  | 0.51 | 0.42  | 0.51 | 0.45  | 0.52 | 0.48  | 0.50 | 0.46  | 0.43 | 0.46  | 0.50 |
| <b>THF</b>              | 0.40  | 0.54 | 0.40  | 0.50 | 0.38  | 0.54 | 0.41  | 0.53 | 0.40  | 0.54 | 0.40  | 0.49 |
| <b>CHCl<sub>3</sub></b> | 0.44  | 0.52 | 0.42  | 0.50 | 0.42  | 0.54 | 0.41  | 0.52 | 0.44  | 0.52 | 0.43  | 0.52 |
| <b>Methanol</b>         | 0.43  | 0.47 | 0.43  | 0.46 | 0.45  | 0.45 | 0.47  | 0.45 | 0.43  | 0.47 | 0.48  | 0.46 |
| <b>Acetonitrile</b>     | 0.48  | 0.45 | 0.39  | 0.42 | 0.51  | 0.44 | 0.55  | 0.43 | 0.48  | 0.45 | 0.51  | 0.45 |
| <b>DMF</b>              | 0.47  | 0.47 | 0.41  | 0.46 | 0.51  | 0.46 | 0.53  | 0.45 | 0.47  | 0.47 | 0.48  | 0.47 |
| <b>DMSO</b>             | 0.42  | 0.47 | 0.43  | 0.50 | 0.53  | 0.45 | 0.54  | 0.44 | 0.48  | 0.44 | 0.50  | 0.46 |

**xyz coordinates of TPA based organic dyes by DFT analysis:**

**TPA-1:**

6 -3.947955000 -4.905596000 1.353740000

6 -4.058494000 -6.298044000 1.495497000

6 -4.407117000 -6.853229000 2.724931000

|   |              |              |              |
|---|--------------|--------------|--------------|
| 6 | -4.632550000 | -6.036930000 | 3.835104000  |
| 6 | -4.514074000 | -4.652409000 | 3.699191000  |
| 6 | -4.184206000 | -4.086624000 | 2.469365000  |
| 7 | -3.601045000 | -4.333647000 | 0.098039000  |
| 6 | -2.665031000 | -3.269576000 | 0.038365000  |
| 6 | -4.196237000 | -4.829891000 | -1.094641000 |
| 6 | -3.426731000 | -5.011168000 | -2.255100000 |
| 6 | -4.017575000 | -5.490101000 | -3.422518000 |
| 6 | -5.375438000 | -5.813764000 | -3.450659000 |
| 6 | -6.140852000 | -5.643720000 | -2.295396000 |
| 6 | -5.563516000 | -5.147806000 | -1.128382000 |
| 6 | -2.861572000 | -2.184392000 | -0.832421000 |
| 6 | -1.934400000 | -1.151054000 | -0.902546000 |
| 6 | -0.798607000 | -1.148456000 | -0.079616000 |
| 6 | -0.611623000 | -2.220044000 | 0.806457000  |
| 6 | -1.518420000 | -3.272921000 | 0.850690000  |
| 7 | 0.130553000  | -0.067812000 | -0.131153000 |
| 6 | 1.513832000  | -0.313822000 | -0.199929000 |
| 6 | -0.373361000 | 1.265366000  | -0.092348000 |
| 6 | 0.083224000  | 2.236851000  | -0.996187000 |
| 6 | -0.410127000 | 3.535827000  | -0.952943000 |
| 6 | -1.406194000 | 3.897138000  | -0.029979000 |
| 6 | -1.877908000 | 2.916934000  | 0.859063000  |
| 6 | -1.356835000 | 1.628310000  | 0.839376000  |

|   |              |              |              |
|---|--------------|--------------|--------------|
| 7 | -1.923631000 | 5.217673000  | 0.002625000  |
| 6 | -2.190223000 | 5.848067000  | 1.249431000  |
| 6 | -2.173932000 | 5.914896000  | -1.211776000 |
| 6 | -3.359400000 | 6.604801000  | 1.428648000  |
| 6 | -3.611920000 | 7.229326000  | 2.648209000  |
| 6 | -2.718561000 | 7.096975000  | 3.713072000  |
| 6 | -1.559615000 | 6.337689000  | 3.540581000  |
| 6 | -1.289026000 | 5.724354000  | 2.319137000  |
| 6 | -1.823819000 | 7.268541000  | -1.340380000 |
| 6 | -2.078182000 | 7.949921000  | -2.528741000 |
| 6 | -2.666005000 | 7.294228000  | -3.612268000 |
| 6 | -3.007261000 | 5.945902000  | -3.490097000 |
| 6 | -2.774191000 | 5.260661000  | -2.299494000 |
| 6 | 2.441306000  | 0.578303000  | 0.370962000  |
| 6 | 3.802812000  | 0.323678000  | 0.289892000  |
| 6 | 4.310939000  | -0.824623000 | -0.346756000 |
| 6 | 3.372147000  | -1.711033000 | -0.913778000 |
| 6 | 2.011249000  | -1.464891000 | -0.848348000 |
| 6 | 5.752947000  | -1.037758000 | -0.385877000 |
| 6 | 6.414935000  | -2.070410000 | -0.954582000 |
| 6 | 7.881252000  | -2.198244000 | -1.077013000 |
| 6 | 8.812651000  | -1.474431000 | -0.143104000 |
| 8 | 8.348342000  | -2.901063000 | -1.972386000 |
| 6 | 8.516693000  | -1.239760000 | 1.207950000  |

|   |              |              |              |
|---|--------------|--------------|--------------|
| 6 | 9.451677000  | -0.618643000 | 2.037468000  |
| 6 | 10.685513000 | -0.217541000 | 1.524508000  |
| 6 | 10.992496000 | -0.457392000 | 0.181845000  |
| 6 | 10.068141000 | -1.093374000 | -0.641274000 |
| 1 | -3.870592000 | -6.936975000 | 0.639163000  |
| 1 | -4.488194000 | -7.932518000 | 2.817107000  |
| 1 | -4.896761000 | -6.473849000 | 4.793072000  |
| 1 | -4.693862000 | -4.004038000 | 4.552005000  |
| 1 | -4.107576000 | -3.009546000 | 2.364679000  |
| 1 | -2.367985000 | -4.775954000 | -2.234283000 |
| 1 | -3.406994000 | -5.624587000 | -4.310819000 |
| 1 | -5.830572000 | -6.193679000 | -4.360011000 |
| 1 | -7.199982000 | -5.884897000 | -2.303501000 |
| 1 | -6.165386000 | -5.005374000 | -0.237267000 |
| 1 | -3.740756000 | -2.162083000 | -1.467123000 |
| 1 | -2.097587000 | -0.325331000 | -1.587283000 |
| 1 | 0.260894000  | -2.234282000 | 1.451387000  |
| 1 | -1.349026000 | -4.099744000 | 1.531861000  |
| 1 | 0.842525000  | 1.973719000  | -1.725276000 |
| 1 | -0.035647000 | 4.276762000  | -1.650853000 |
| 1 | -2.647559000 | 3.175181000  | 1.578356000  |
| 1 | -1.726581000 | 0.886292000  | 1.539277000  |
| 1 | -4.062873000 | 6.699732000  | 0.608429000  |
| 1 | -4.521101000 | 7.811298000  | 2.769302000  |

|   |              |              |              |
|---|--------------|--------------|--------------|
| 1 | -2.922489000 | 7.579177000  | 4.664037000  |
| 1 | -0.851164000 | 6.232079000  | 4.357260000  |
| 1 | -0.380236000 | 5.147358000  | 2.185493000  |
| 1 | -1.354340000 | 7.778753000  | -0.506105000 |
| 1 | -1.800711000 | 8.996909000  | -2.611114000 |
| 1 | -2.855610000 | 7.826683000  | -4.539059000 |
| 1 | -3.472504000 | 5.424329000  | -4.321663000 |
| 1 | -3.054823000 | 4.217065000  | -2.204176000 |
| 1 | 2.086224000  | 1.465847000  | 0.881857000  |
| 1 | 4.497405000  | 1.025733000  | 0.744452000  |
| 1 | 3.714216000  | -2.602199000 | -1.430360000 |
| 1 | 1.316158000  | -2.158797000 | -1.307017000 |
| 1 | 6.340126000  | -0.252331000 | 0.085497000  |
| 1 | 5.881534000  | -2.849043000 | -1.493893000 |
| 1 | 7.568275000  | -1.570539000 | 1.617538000  |
| 1 | 9.217765000  | -0.453934000 | 3.085300000  |
| 1 | 11.409564000 | 0.272130000  | 2.169455000  |
| 1 | 11.955837000 | -0.154384000 | -0.218065000 |
| 1 | 10.297388000 | -1.310672000 | -1.679128000 |

**TPA-2:**

|   |              |              |              |
|---|--------------|--------------|--------------|
| 7 | 0.075468000  | -0.173434000 | -0.004860000 |
| 6 | 1.291936000  | -0.908765000 | -0.008033000 |
| 6 | -1.181062000 | -0.856624000 | 0.010521000  |
| 6 | 0.096896000  | 1.256612000  | -0.010895000 |

|   |              |              |              |
|---|--------------|--------------|--------------|
| 6 | -2.240394000 | -0.420775000 | -0.806170000 |
| 6 | -3.474527000 | -1.069276000 | -0.771696000 |
| 6 | -3.667409000 | -2.189609000 | 0.053319000  |
| 6 | -2.605583000 | -2.637619000 | 0.856376000  |
| 6 | -1.382217000 | -1.968250000 | 0.849346000  |
| 6 | 2.417021000  | -0.445540000 | 0.701760000  |
| 6 | 3.604896000  | -1.170408000 | 0.684996000  |
| 6 | 3.724617000  | -2.385168000 | -0.024506000 |
| 6 | 2.587329000  | -2.839291000 | -0.730262000 |
| 6 | 1.399052000  | -2.119153000 | -0.727179000 |
| 6 | -0.770572000 | 1.987700000  | 0.820842000  |
| 6 | -0.768424000 | 3.382137000  | 0.795946000  |
| 6 | 0.125160000  | 4.078301000  | -0.034458000 |
| 6 | 1.004123000  | 3.350377000  | -0.853593000 |
| 6 | 0.977804000  | 1.956246000  | -0.856011000 |
| 6 | 4.999626000  | -3.099086000 | -0.000254000 |
| 7 | -4.922277000 | -2.861257000 | 0.076544000  |
| 7 | 0.139762000  | 5.501706000  | -0.047137000 |
| 6 | -5.699682000 | -3.116707000 | 1.224828000  |
| 6 | -6.880338000 | -3.808166000 | 0.833294000  |
| 6 | -6.815233000 | -3.980360000 | -0.607202000 |
| 6 | -5.598567000 | -3.385344000 | -1.044287000 |
| 6 | -0.001754000 | 6.317875000  | -1.188345000 |
| 6 | 0.067867000  | 7.681455000  | -0.786811000 |

|   |              |              |              |
|---|--------------|--------------|--------------|
| 6 | 0.261030000  | 7.692467000  | 0.652347000  |
| 6 | 0.299738000  | 6.335250000  | 1.078896000  |
| 6 | 0.412888000  | 8.717683000  | 1.595634000  |
| 6 | 0.605684000  | 8.383930000  | 2.937569000  |
| 6 | 0.654860000  | 7.035158000  | 3.341022000  |
| 6 | 0.505942000  | 5.994485000  | 2.420161000  |
| 6 | -0.216299000 | 5.957278000  | -2.523108000 |
| 6 | -0.341785000 | 6.983947000  | -3.462969000 |
| 6 | -0.261713000 | 8.338443000  | -3.084390000 |
| 6 | -0.060981000 | 8.692361000  | -1.748811000 |
| 6 | -5.465349000 | -2.763512000 | 2.558168000  |
| 6 | -6.423901000 | -3.129735000 | 3.506918000  |
| 6 | -7.591484000 | -3.826388000 | 3.138340000  |
| 6 | -7.826139000 | -4.164397000 | 1.804129000  |
| 6 | -7.663210000 | -4.586781000 | -1.543778000 |
| 6 | -7.291385000 | -4.599334000 | -2.889524000 |
| 6 | -6.077191000 | -4.017203000 | -3.303438000 |
| 6 | -5.214473000 | -3.406091000 | -2.389457000 |
| 6 | 5.280280000  | -4.288436000 | -0.586126000 |
| 6 | 6.543083000  | -5.037218000 | -0.472854000 |
| 6 | 7.831950000  | -4.368079000 | -0.112025000 |
| 6 | 8.147598000  | -3.051855000 | -0.498119000 |
| 6 | 9.392757000  | -2.500003000 | -0.177997000 |
| 6 | 10.332825000 | -3.252817000 | 0.534403000  |



|   |              |              |              |
|---|--------------|--------------|--------------|
| 6 | 10.032255000 | -4.569562000 | 0.909938000  |
| 6 | 8.796616000  | -5.126165000 | 0.578461000  |
| 8 | 6.524653000  | -6.279830000 | -0.667659000 |
| 1 | -2.097539000 | 0.435070000  | -1.455699000 |
| 1 | -4.293585000 | -0.711189000 | -1.385048000 |
| 1 | -2.744155000 | -3.508653000 | 1.486760000  |
| 1 | -0.574729000 | -2.312628000 | 1.485145000  |
| 1 | 2.351944000  | 0.476246000  | 1.267658000  |
| 1 | 4.458684000  | -0.799651000 | 1.245167000  |
| 1 | 2.637499000  | -3.760204000 | -1.300832000 |
| 1 | 0.546338000  | -2.482730000 | -1.288390000 |
| 1 | -1.454813000 | 1.460201000  | 1.475341000  |
| 1 | -1.458713000 | 3.937143000  | 1.421070000  |
| 1 | 1.703746000  | 3.881011000  | -1.489434000 |
| 1 | 1.648947000  | 1.404420000  | -1.504011000 |
| 1 | 5.781540000  | -2.610495000 | 0.577098000  |
| 1 | 0.385652000  | 9.757979000  | 1.286522000  |
| 1 | 0.723096000  | 9.168582000  | 3.677648000  |
| 1 | 0.814588000  | 6.796464000  | 4.387731000  |
| 1 | 0.555054000  | 4.959794000  | 2.738623000  |
| 1 | -0.289928000 | 4.918335000  | -2.822370000 |
| 1 | -0.507716000 | 6.729747000  | -4.505047000 |
| 1 | -0.361769000 | 9.111795000  | -3.838772000 |
| 1 | -0.010260000 | 9.737294000  | -1.458904000 |

|   |              |              |              |
|---|--------------|--------------|--------------|
| 1 | -4.574776000 | -2.219175000 | 2.849642000  |
| 1 | -6.264422000 | -2.868279000 | 4.548215000  |
| 1 | -8.315457000 | -4.097925000 | 3.899465000  |
| 1 | -8.731739000 | -4.692388000 | 1.521981000  |
| 1 | -8.594786000 | -5.045094000 | -1.226528000 |
| 1 | -7.939618000 | -5.064811000 | -3.624569000 |
| 1 | -5.802111000 | -4.045392000 | -4.353026000 |
| 1 | -4.277705000 | -2.969677000 | -2.715628000 |
| 1 | 4.511460000  | -4.847081000 | -1.113082000 |
| 1 | 7.436232000  | -2.473246000 | -1.076565000 |
| 1 | 9.630576000  | -1.488490000 | -0.491732000 |
| 1 | 11.296384000 | -2.821416000 | 0.786953000  |
| 1 | 10.763143000 | -5.159739000 | 1.453450000  |
| 1 | 8.556071000  | -6.150219000 | 0.841124000  |

**TPA-3:**

|   |              |              |              |
|---|--------------|--------------|--------------|
| 6 | -3.864269000 | -0.941673000 | -0.050313000 |
| 8 | -4.066987000 | -1.999788000 | -0.647294000 |
| 6 | -2.489078000 | -0.419270000 | 0.135602000  |
| 6 | -1.424868000 | -1.153869000 | -0.256714000 |
| 1 | -2.367918000 | 0.573444000  | 0.555285000  |
| 1 | -1.656008000 | -2.130575000 | -0.680224000 |
| 6 | -0.014845000 | -0.804231000 | -0.186312000 |
| 6 | 0.944822000  | -1.725564000 | -0.648762000 |
| 6 | 0.464418000  | 0.420063000  | 0.324773000  |
| 6 | 2.304083000  | -1.449012000 | -0.614569000 |
| 1 | 0.608526000  | -2.674521000 | -1.058009000 |
| 6 | 1.818486000  | 0.704789000  | 0.373703000  |

|   |              |              |              |
|---|--------------|--------------|--------------|
| 1 | -0.235994000 | 1.157166000  | 0.704907000  |
| 6 | 2.768817000  | -0.224937000 | -0.099297000 |
| 1 | 3.014433000  | -2.175562000 | -0.992075000 |
| 1 | 2.156938000  | 1.648989000  | 0.785206000  |
| 7 | 4.146493000  | 0.067776000  | -0.052227000 |
| 6 | 5.103646000  | -0.970341000 | 0.147678000  |
| 6 | 4.913621000  | -1.931823000 | 1.152003000  |
| 6 | 6.255576000  | -1.031488000 | -0.650392000 |
| 6 | 5.854952000  | -2.941601000 | 1.341572000  |
| 1 | 4.028758000  | -1.881664000 | 1.777778000  |
| 6 | 7.200051000  | -2.034703000 | -0.441690000 |
| 1 | 6.403974000  | -0.291045000 | -1.429279000 |
| 6 | 7.004143000  | -2.997324000 | 0.550301000  |
| 1 | 5.694761000  | -3.679204000 | 2.122564000  |
| 1 | 8.087163000  | -2.069797000 | -1.067346000 |
| 1 | 7.738770000  | -3.781239000 | 0.706007000  |
| 6 | 4.609632000  | 1.405480000  | -0.224563000 |
| 6 | 4.102825000  | 2.209056000  | -1.257158000 |
| 6 | 5.590946000  | 1.927331000  | 0.631358000  |
| 6 | 4.563359000  | 3.514360000  | -1.418780000 |
| 1 | 3.351310000  | 1.804979000  | -1.927229000 |
| 6 | 6.057743000  | 3.227870000  | 0.451261000  |
| 1 | 5.982590000  | 1.308631000  | 1.431899000  |
| 6 | 5.544687000  | 4.030125000  | -0.569842000 |
| 1 | 4.162379000  | 4.124870000  | -2.222621000 |
| 1 | 6.817820000  | 3.618793000  | 1.121429000  |
| 1 | 5.906257000  | 5.044938000  | -0.703488000 |
| 6 | -4.997473000 | -0.128586000 | 0.513512000  |
| 6 | -6.296412000 | -0.093747000 | -0.107713000 |
| 6 | -4.790265000 | 0.568536000  | 1.694162000  |

|   |              |              |              |
|---|--------------|--------------|--------------|
| 6 | -6.607146000 | -0.761085000 | -1.325769000 |
| 6 | -7.331155000 | 0.682812000  | 0.517213000  |
| 6 | -5.820596000 | 1.305138000  | 2.315813000  |
| 1 | -3.819365000 | 0.522934000  | 2.176633000  |
| 6 | -7.861672000 | -0.662465000 | -1.886738000 |
| 1 | -5.844305000 | -1.365078000 | -1.797116000 |
| 6 | -8.614116000 | 0.757621000  | -0.088664000 |
| 6 | -7.063940000 | 1.364832000  | 1.733734000  |
| 1 | -5.623291000 | 1.821550000  | 3.250290000  |
| 6 | -8.878059000 | 0.099979000  | -1.266730000 |
| 1 | -8.073463000 | -1.181309000 | -2.817230000 |
| 1 | -9.383953000 | 1.350162000  | 0.398867000  |
| 1 | -7.864350000 | 1.935574000  | 2.197610000  |
| 1 | -9.862053000 | 0.164195000  | -1.721973000 |

**TPA-4:**

|   |              |              |              |
|---|--------------|--------------|--------------|
| 6 | -3.667631000 | -1.785277000 | -0.666509000 |
| 8 | -3.692821000 | -2.942414000 | -1.087913000 |
| 6 | -2.389589000 | -1.079407000 | -0.430212000 |
| 6 | -1.216660000 | -1.727289000 | -0.603408000 |
| 1 | -2.413406000 | -0.034122000 | -0.143991000 |
| 1 | -1.294625000 | -2.770047000 | -0.908312000 |
| 6 | 0.132093000  | -1.208192000 | -0.437604000 |
| 6 | 1.228485000  | -2.055255000 | -0.690523000 |
| 6 | 0.420853000  | 0.111693000  | -0.032604000 |
| 6 | 2.539081000  | -1.618846000 | -0.559310000 |
| 1 | 1.040840000  | -3.075913000 | -1.013155000 |
| 6 | 1.723942000  | 0.556953000  | 0.112686000  |
| 1 | -0.390437000 | 0.797974000  | 0.189484000  |
| 6 | 2.812982000  | -0.300335000 | -0.151672000 |
| 1 | 3.358955000  | -2.293992000 | -0.776065000 |

|   |              |              |              |
|---|--------------|--------------|--------------|
| 1 | 1.913870000  | 1.572770000  | 0.440362000  |
| 7 | 4.139273000  | 0.153704000  | -0.005430000 |
| 6 | 5.168086000  | -0.738181000 | 0.419117000  |
| 6 | 4.962127000  | -1.596518000 | 1.509899000  |
| 6 | 6.404698000  | -0.755756000 | -0.242815000 |
| 6 | 5.973008000  | -2.463906000 | 1.919032000  |
| 1 | 4.010468000  | -1.578594000 | 2.030528000  |
| 6 | 7.415982000  | -1.613876000 | 0.184945000  |
| 1 | 6.565575000  | -0.095104000 | -1.088190000 |
| 6 | 7.205736000  | -2.475482000 | 1.263145000  |
| 1 | 5.799403000  | -3.122904000 | 2.764734000  |
| 1 | 8.368369000  | -1.616909000 | -0.337175000 |
| 1 | 7.993437000  | -3.147517000 | 1.589213000  |
| 6 | 4.476825000  | 1.510540000  | -0.284556000 |
| 6 | 4.001590000  | 2.140029000  | -1.445256000 |
| 6 | 5.301303000  | 2.227892000  | 0.595151000  |
| 6 | 4.336084000  | 3.466790000  | -1.709273000 |
| 1 | 3.372929000  | 1.585083000  | -2.133600000 |
| 6 | 5.644851000  | 3.548630000  | 0.313568000  |
| 1 | 5.668495000  | 1.744382000  | 1.494198000  |
| 6 | 5.161472000  | 4.177403000  | -0.835536000 |
| 1 | 3.960986000  | 3.941125000  | -2.611487000 |
| 1 | 6.283757000  | 4.091641000  | 1.003942000  |
| 1 | 5.425988000  | 5.208487000  | -1.048478000 |
| 6 | -4.961689000 | -1.068562000 | -0.404076000 |
| 6 | -5.052739000 | 0.120844000  | 0.297183000  |
| 6 | -6.154474000 | -1.679096000 | -0.888120000 |
| 6 | -6.304607000 | 0.745750000  | 0.535158000  |
| 1 | -4.166729000 | 0.598923000  | 0.702626000  |
| 6 | -7.378163000 | -1.094956000 | -0.683593000 |

|   |              |              |              |
|---|--------------|--------------|--------------|
| 1 | -6.055763000 | -2.618190000 | -1.420674000 |
| 6 | -6.412940000 | 1.964887000  | 1.257418000  |
| 6 | -7.495449000 | 0.130638000  | 0.029755000  |
| 1 | -8.281041000 | -1.565672000 | -1.064088000 |
| 6 | -7.639658000 | 2.552838000  | 1.467405000  |
| 1 | -5.507434000 | 2.427672000  | 1.641484000  |
| 6 | -8.744507000 | 0.762700000  | 0.262501000  |
| 6 | -8.816095000 | 1.945865000  | 0.964224000  |
| 1 | -7.710282000 | 3.485032000  | 2.019887000  |
| 1 | -9.647037000 | 0.295399000  | -0.122484000 |
| 1 | -9.778637000 | 2.418737000  | 1.135842000  |

**TPA-5:**

|   |              |              |              |
|---|--------------|--------------|--------------|
| 6 | -2.385049000 | -1.400508000 | -0.292201000 |
| 8 | -2.485302000 | -2.541092000 | -0.746990000 |
| 6 | -1.062806000 | -0.766718000 | -0.095804000 |
| 6 | 0.065973000  | -1.456496000 | -0.372462000 |
| 1 | -1.018665000 | 0.262158000  | 0.242414000  |
| 1 | -0.080500000 | -2.475068000 | -0.729534000 |
| 6 | 1.445262000  | -1.009238000 | -0.261046000 |
| 6 | 2.480316000  | -1.870234000 | -0.674659000 |
| 6 | 1.823780000  | 0.252287000  | 0.243921000  |
| 6 | 3.815484000  | -1.498875000 | -0.607593000 |
| 1 | 2.222922000  | -2.847278000 | -1.074881000 |
| 6 | 3.153068000  | 0.630283000  | 0.329195000  |
| 1 | 1.063906000  | 0.942812000  | 0.596582000  |
| 6 | 4.179373000  | -0.237561000 | -0.100979000 |
| 1 | 4.584581000  | -2.181215000 | -0.951015000 |
| 1 | 3.412764000  | 1.600257000  | 0.737919000  |
| 7 | 5.531692000  | 0.149796000  | -0.018043000 |
| 6 | 6.551055000  | -0.819437000 | 0.218355000  |

|   |              |              |              |
|---|--------------|--------------|--------------|
| 6 | 6.400256000  | -1.780188000 | 1.229855000  |
| 6 | 7.723311000  | -0.813241000 | -0.551864000 |
| 6 | 7.400589000  | -2.724073000 | 1.453511000  |
| 1 | 5.498945000  | -1.781776000 | 1.833778000  |
| 6 | 8.726036000  | -1.750101000 | -0.309125000 |
| 1 | 7.841131000  | -0.073088000 | -1.336272000 |
| 6 | 8.569526000  | -2.712885000 | 0.689708000  |
| 1 | 7.270185000  | -3.462369000 | 2.239367000  |
| 1 | 9.628200000  | -1.733726000 | -0.913676000 |
| 1 | 9.349719000  | -3.445411000 | 0.871784000  |
| 6 | 5.908020000  | 1.514669000  | -0.187660000 |
| 6 | 5.373488000  | 2.278188000  | -1.236626000 |
| 6 | 6.830783000  | 2.105214000  | 0.688631000  |
| 6 | 5.748184000  | 3.611179000  | -1.393917000 |
| 1 | 4.667416000  | 1.821801000  | -1.922294000 |
| 6 | 7.212531000  | 3.433759000  | 0.512925000  |
| 1 | 7.243924000  | 1.517492000  | 1.501574000  |
| 6 | 6.671152000  | 4.195656000  | -0.524305000 |
| 1 | 5.326427000  | 4.190108000  | -2.210393000 |
| 1 | 7.927806000  | 3.877792000  | 1.199143000  |
| 1 | 6.966012000  | 5.232273000  | -0.654398000 |
| 6 | -3.625517000 | -0.621196000 | 0.047346000  |
| 6 | -3.615267000 | 0.608531000  | 0.784403000  |
| 6 | -4.832746000 | -1.133251000 | -0.377056000 |
| 6 | -4.777855000 | 1.275868000  | 1.057982000  |
| 1 | -2.679507000 | 1.012105000  | 1.154284000  |
| 6 | -6.063687000 | -0.466652000 | -0.121311000 |
| 1 | -4.828779000 | -2.070904000 | -0.924155000 |
| 6 | -6.041643000 | 0.776751000  | 0.614259000  |
| 1 | -4.756373000 | 2.202615000  | 1.625260000  |

|   |               |              |              |
|---|---------------|--------------|--------------|
| 6 | -7.292193000  | -0.978450000 | -0.562648000 |
| 6 | -7.246768000  | 1.440858000  | 0.866962000  |
| 6 | -8.498068000  | -0.314484000 | -0.309839000 |
| 1 | -7.305735000  | -1.914339000 | -1.115960000 |
| 6 | -8.474709000  | 0.930886000  | 0.424454000  |
| 1 | -7.231247000  | 2.376728000  | 1.420801000  |
| 6 | -9.757742000  | -0.824739000 | -0.755068000 |
| 6 | -9.713098000  | 1.600005000  | 0.673601000  |
| 6 | -10.921579000 | -0.151607000 | -0.495055000 |
| 1 | -9.771577000  | -1.761011000 | -1.306640000 |
| 6 | -10.898374000 | 1.077016000  | 0.228540000  |
| 1 | -9.694953000  | 2.535940000  | 1.225735000  |
| 1 | -11.871308000 | -0.550112000 | -0.839185000 |
| 1 | -11.831240000 | 1.597082000  | 0.425404000  |

**TPA-6:**

|   |              |              |              |
|---|--------------|--------------|--------------|
| 6 | 3.349951000  | -0.951813000 | 1.050786000  |
| 8 | 3.483830000  | -1.882133000 | 1.844463000  |
| 6 | 2.016236000  | -0.481878000 | 0.612712000  |
| 6 | 0.894855000  | -1.059471000 | 1.100509000  |
| 1 | 1.981710000  | 0.314033000  | -0.124382000 |
| 1 | 1.053405000  | -1.849425000 | 1.833929000  |
| 6 | -0.488968000 | -0.763011000 | 0.769334000  |
| 6 | -1.516754000 | -1.482276000 | 1.410176000  |
| 6 | -0.878051000 | 0.214703000  | -0.170453000 |
| 6 | -2.856797000 | -1.242250000 | 1.143356000  |
| 1 | -1.251150000 | -2.236828000 | 2.145857000  |
| 6 | -2.211595000 | 0.457693000  | -0.452642000 |
| 1 | -0.121632000 | 0.783368000  | -0.702297000 |
| 6 | -3.231394000 | -0.265072000 | 0.202541000  |
| 1 | -3.622398000 | -1.805199000 | 1.664873000  |



|   |              |              |              |
|---|--------------|--------------|--------------|
| 1 | -2.479133000 | 1.205219000  | -1.190875000 |
| 7 | -4.588377000 | -0.016348000 | -0.083070000 |
| 6 | -5.545875000 | -1.072396000 | -0.027701000 |
| 6 | -5.280955000 | -2.306941000 | -0.639689000 |
| 6 | -6.771383000 | -0.880582000 | 0.626974000  |
| 6 | -6.223110000 | -3.332081000 | -0.584329000 |
| 1 | -4.338003000 | -2.455313000 | -1.155394000 |
| 6 | -7.714785000 | -1.905735000 | 0.661969000  |
| 1 | -6.977036000 | 0.072472000  | 1.102797000  |
| 6 | -7.445524000 | -3.137260000 | 0.061978000  |
| 1 | -6.004857000 | -4.282586000 | -1.062390000 |
| 1 | -8.659644000 | -1.743203000 | 1.172304000  |
| 1 | -8.180030000 | -3.935840000 | 0.096592000  |
| 6 | -5.031015000 | 1.295185000  | -0.424879000 |
| 6 | -4.603369000 | 2.408358000  | 0.314741000  |
| 6 | -5.913466000 | 1.484300000  | -1.498958000 |
| 6 | -5.041815000 | 3.686317000  | -0.026469000 |
| 1 | -3.930095000 | 2.264956000  | 1.153331000  |
| 6 | -6.360122000 | 2.764154000  | -1.821649000 |
| 1 | -6.244514000 | 0.625698000  | -2.073523000 |
| 6 | -5.924499000 | 3.872154000  | -1.092279000 |
| 1 | -4.702385000 | 4.538606000  | 0.554976000  |
| 1 | -7.042780000 | 2.895321000  | -2.656168000 |
| 1 | -6.269743000 | 4.868433000  | -1.350411000 |
| 6 | 4.552577000  | -0.289666000 | 0.420854000  |
| 6 | 4.727947000  | 1.112314000  | 0.510631000  |
| 6 | 5.493271000  | -1.091763000 | -0.273567000 |
| 6 | 3.863179000  | 1.961510000  | 1.276117000  |
| 6 | 5.850681000  | 1.732238000  | -0.155747000 |
| 6 | 6.603170000  | -0.453469000 | -0.945335000 |

|   |             |              |              |
|---|-------------|--------------|--------------|
| 6 | 5.385715000 | -2.517105000 | -0.376896000 |
| 6 | 4.068981000 | 3.315240000  | 1.343334000  |
| 1 | 3.040835000 | 1.520056000  | 1.827774000  |
| 6 | 6.026834000 | 3.147923000  | -0.062362000 |
| 6 | 6.746974000 | 0.934933000  | -0.872446000 |
| 6 | 7.535569000 | -1.254528000 | -1.676092000 |
| 1 | 4.576360000 | -3.018362000 | 0.137463000  |
| 6 | 6.302031000 | -3.246848000 | -1.087911000 |
| 6 | 5.160027000 | 3.922212000  | 0.659969000  |
| 1 | 3.399209000 | 3.932563000  | 1.934874000  |
| 1 | 6.874667000 | 3.595153000  | -0.574646000 |
| 1 | 7.584521000 | 1.406980000  | -1.381075000 |
| 6 | 7.392415000 | -2.612922000 | -1.748065000 |
| 1 | 8.362546000 | -0.755280000 | -2.174196000 |
| 1 | 6.199296000 | -4.326547000 | -1.145722000 |
| 1 | 5.306468000 | 4.996148000  | 0.726131000  |
| 1 | 8.106762000 | -3.211932000 | -2.305104000 |

### **Light harvesting efficiency (LHE):**

The light harvesting efficiency (LHE) is a very important factor for organic dyes, considering the role of dyes in the optoelectronics. The LHE can be calculated using the oscillator strength obtained from TD-DFT calculations.<sup>3</sup> The LHE can be calculated using the following formula.<sup>4</sup>

$$\text{LHE}(\lambda) = 1 - 10^{-A} = 1 - 10^{-f}$$

where,  $f$  is the oscillator strength and  $A$  is absorbance of the organic molecule at a given wavelength. The calculated LHE of the dyes are tabulated in Table ST 9. From the table ST 9', it is clear that TPA-1, TPA-2 and TPA-6 dye molecules shows decreased LHE than the reference molecule TPA-Acetophenone. The lower HOMO–LUMO gap of TPA-6 results in

lower LHE with 0.63, while higher HOMO–LUMO gap molecule TPA-3 has a higher LHE with 0.84. This shows that TPA based organic dyes can be tuned through the proper substitution of (electron donating and electron withdrawing functional groups) for better LHE.

| Compound | TPA-Acetophenone | TPA-1 | TPA-2 | TPA-3 | TPA-4 | TPA-5 | TPA-6 |
|----------|------------------|-------|-------|-------|-------|-------|-------|
| LHE      | 0.827            | 0.685 | 0.666 | 0.845 | 0.821 | 0.836 | 0.638 |

### 5. Reference:

- 1 V. E. Lippert, A: *Phys. Sci.*, 1955, 10, 541–545.
- 2 (a) N. Mataga, Y. Kaifu and M. Koizumi, *Bull. Chem. Soc. Jpn.*, 1955, 28, 690–691.  
(b) N. Mataga, Y. Kaifu and M. Koizumi, *Bull. Chem. Soc. Jpn.*, 1956, 29, 465–470.
3. a) S. Hwang, J. H. Lee, C. Park, H. Lee, C. Kim, C. Park, M.-H. Lee, W. Lee, J. Park and K. Kim, *Chem. Commun.*, 2007, 4887–4889; (b) A. Fitri, A. T. Benjelloun, M. Benzakour, M. Mcharfi, M. Hamidi and M. Bouachrine, *Spectrochim. Acta, Part A.*, 2014, 132, 232–238.
4. L. Minjie, K. Li, D. Ling, Z. Qing, L. Zhonggao, W. Qiang, L. Wencong, P. Dengyu and W. Zhen, *J. Phys. Chem. C.*, 2015, 119, 9782–9790.
